# Supplementary material for: Ferrocene-based multichannel molecular chemosensors with high selectivity and sensitivity for Pb(ii) and Hg(ii) metal cations
Source: Royal Society of Chemistry journal article supplement (doi:10.1039/c0dt00450b), 2010-01-01
Supplement: c0dt00450b.pdf [file c0dt00450b.pdf]

## Electronic Supplementary Information

# Ferrocene-based multichannel molecular chemosensors with high selectivity and sensitivity for Pb(II) and Hg(II) metal cations

María Alfonso, Alberto Tárraga, \* and Pedro Molina\*

Departamento de Química Orgánica. Facultad de Química. Universidad de Murcia.

Campus de Espinardo, E-30100 Murcia, Spain.

E-mail: [pmolina@um.es](mailto:pmolina@um.es); [atarraga@um.es](mailto:atarraga@um.es)

### Table of contents

|                                                                                                                                                   |     |
|---------------------------------------------------------------------------------------------------------------------------------------------------|-----|
| <sup>1</sup> H- and <sup>13</sup> C-NMR of ligands <b>6a</b> , <b>4b-6b</b>                                                                       | S4  |
| <b>Figure SI 1.</b> Evolution of the CV and OSWV of <b>6a</b> in the presence of increasing amounts of several cations in CH <sub>3</sub> CN.     | S8  |
| <b>Figure SI 2.</b> Evolution of the CV and OSWV of <b>6b</b> in the presence of increasing amounts of several cations in CH <sub>3</sub> CN.     | S9  |
| <b>Figure SI 3.</b> Evolution of the LSW of <b>6a</b> in the presence of increasing amounts of several cations in CH <sub>3</sub> CN              | S10 |
| <b>Figure SI 4.</b> Evolution of the LSW of <b>6b</b> in the presence of increasing amounts of several cations in CH <sub>3</sub> CN              | S11 |
| <b>Figure SI 5.</b> Evolution of the OSWV of <b>6a</b> in the presence of increasing amounts of several anions in CH <sub>3</sub> CN.             | S12 |
| <b>Figure SI 6.</b> Evolution of the OSWV of <b>6b</b> in the presence of increasing amounts of several anions in CH <sub>3</sub> CN.             | S13 |
| <b>Figure SI 7.</b> Changes in the absorption spectrum of <b>6a</b> upon addition of increasing amounts of several cations in CH <sub>3</sub> CN. | S14 |

|                                                                                                                                                                                            |     |
|--------------------------------------------------------------------------------------------------------------------------------------------------------------------------------------------|-----|
| <b>Figure SI 8.</b> Changes in the absorption spectrum of <b>6b</b> upon addition of increasing amounts of several cations in CH <sub>3</sub> CN.                                          | S15 |
| <b>Figure SI 9.</b> Changes in the absorption spectrum of <b>6a</b> upon addition of increasing amounts of several anions in CH <sub>3</sub> CN.                                           | S16 |
| <b>Figure SI 10.</b> Changes in the absorption spectrum of <b>6b</b> upon addition of increasing amounts of several anions in CH <sub>3</sub> CN.                                          | S17 |
| <b>Figure SI 11.</b> Change of absorbance of <b>6a</b> upon addition of Cd <sup>2+</sup> indicating the formation of complex 2:1 and job's plot for <b>6a</b> and several cations.         | S18 |
| <b>Figure SI 12.</b> Job's plot for <b>6b</b> and several cations.                                                                                                                         | S19 |
| <b>Figure SI 13.</b> Reversibility experiment of compound <b>6a</b> .                                                                                                                      | S20 |
| <b>Figure SI 14.</b> Reversibility experiment of compound <b>6b</b> .                                                                                                                      | S21 |
| <b>Figure SI 15.</b> Semilogarithmic plot for determining the detection limit of <b>6a</b> towards several cations.                                                                        | S22 |
| <b>Figure SI 16.</b> Semilogarithmic plot for determining the detection limit of <b>6b</b> towards several cations.                                                                        | S23 |
| <b>Figure SI 17.</b> Fluorescence intensity of ligands <b>6a</b> and <b>6b</b> in CH <sub>3</sub> CN after addition of several cations.                                                    | S24 |
| <b>Figure SI 18.</b> Changes in the fluorescence emission of <b>6a</b> upon addition of Pb <sup>2+</sup> in CH <sub>3</sub> CN.                                                            | S24 |
| <b>Figure SI 19.</b> Changes in the fluorescence emission of <b>6b</b> upon addition of Hg <sup>2+</sup> in CH <sub>3</sub> CN.                                                            | S25 |
| <b>Figure SI 20.</b> Semilogarithmic plot for determining the detection limit of <b>6a</b> and <b>6b</b> towards Pb <sup>2+</sup> and Hg <sup>2+</sup> respectively in CH <sub>3</sub> CN. | S25 |
| <b>Figure SI 21.</b> Changes in the <sup>1</sup> H-NMR spectrum of <b>6a</b> upon addition of increasing amounts of Cd <sup>2+</sup> .                                                     | S26 |
| <b>Figure SI 22.</b> Changes in the <sup>1</sup> H-NMR spectrum of <b>6a</b> upon addition of increasing amounts of Zn <sup>2+</sup> .                                                     | S26 |
| <b>Figure SI 23.</b> Changes in the <sup>1</sup> H-NMR spectrum of <b>6a</b> upon addition of increasing amounts of HP <sub>2</sub> O <sub>7</sub> <sup>3-</sup> .                         | S27 |
| <b>Figure SI 24.</b> Changes in the <sup>1</sup> H-NMR spectrum of <b>6b</b> upon addition of increasing amounts of Pb <sup>2+</sup> .                                                     | S27 |
| <b>Figure SI 25.</b> Changes in the <sup>1</sup> H-NMR spectrum of <b>6b</b> upon addition of increasing amounts of Ni <sup>2+</sup> .                                                     | S28 |

|                                                                                                                                                      |     |
|------------------------------------------------------------------------------------------------------------------------------------------------------|-----|
| <b>Figure SI 26.</b> Changes in the $^1\text{H}$ -NMR spectrum of <b>6b</b> upon addition of increasing amounts of $\text{Cd}^{2+}$ .                | S28 |
| <b>Figure SI 27.</b> Changes in the $^1\text{H}$ -NMR spectrum of <b>6a</b> upon addition of increasing amounts of $\text{HP}_2\text{O}_7^{3-}$ .    | S29 |
| <b>Figure SI 28.</b> Relative abundance of the isotopic cluster of the complex for <b>6a</b> with several cations and $\text{HP}_2\text{O}_7^{3-}$ . | S30 |
| <b>Figure SI 29.</b> Relative abundance of the isotopic cluster of the complex for <b>6b</b> with several cations.                                   | S31 |

## 2-Ferrocenyl-7,8-Diphenyl-3*H*-imidazo[4,5-*f*]quinoxalines, [6a]

$^1\text{H}$  NMR (400MHz, MeOD)

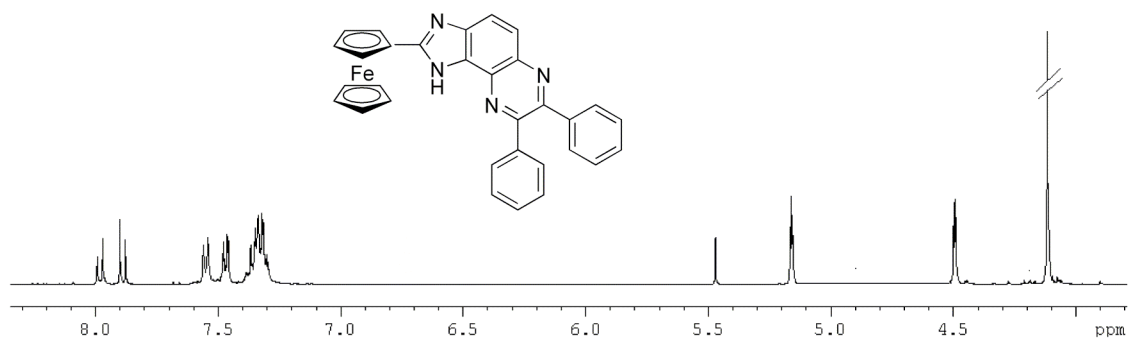

$^{13}\text{C}$  NMR (100 MHz,  $\text{CDCl}_3$ ):

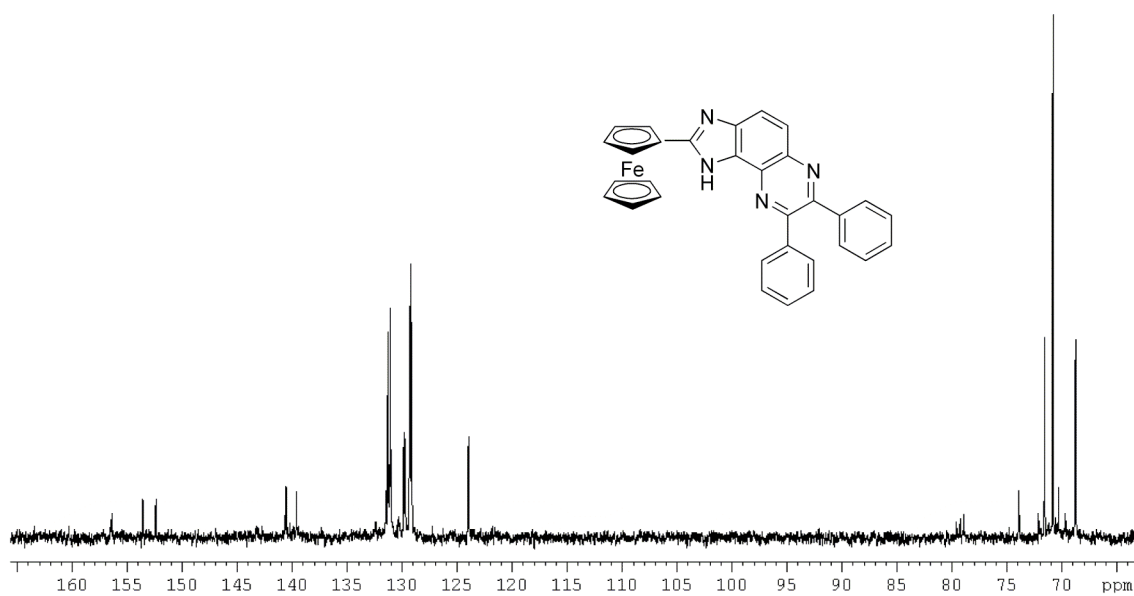

### 5-amino-6-nitro-2,3-di(2-pyridyl)quinoxaline, [4b]

$^1\text{H}$  NMR (400MHz,  $\text{CDCl}_3$ )

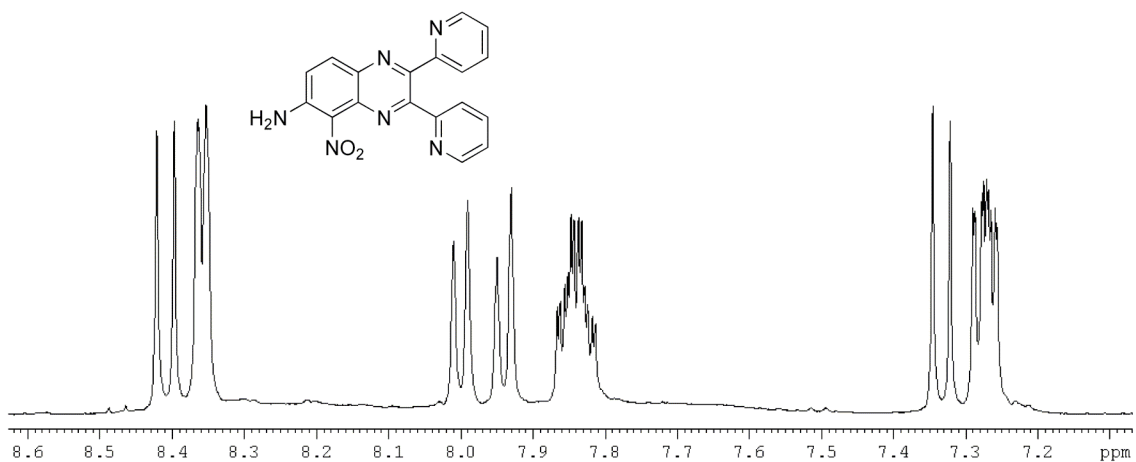

$^{13}\text{C}$  NMR (100 MHz,  $\text{CDCl}_3$ ):

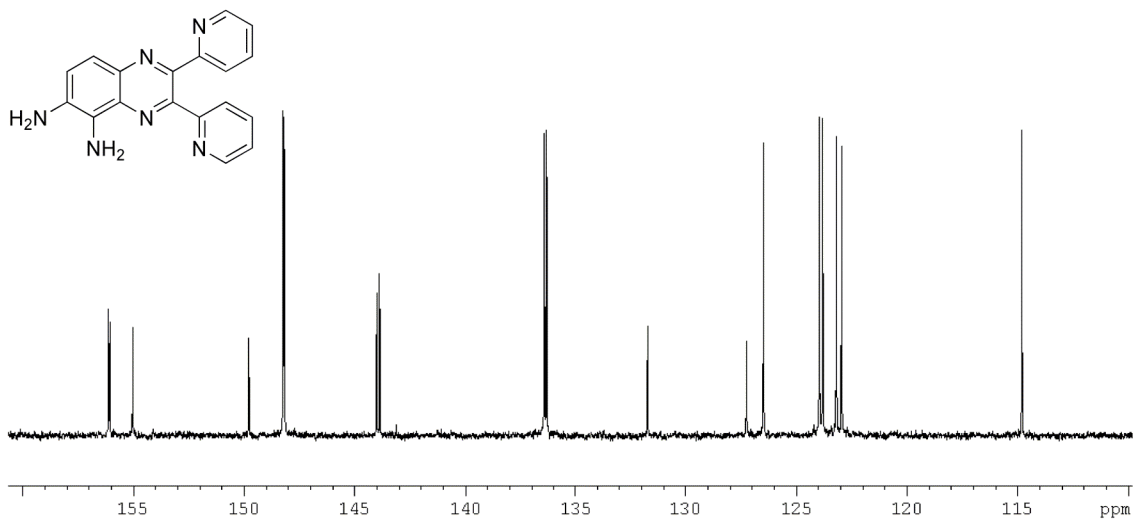

### 5,6-diamino-2,3-di(2-pyridyl)quinoxaline, [5b]

$^1\text{H}$  NMR (400MHz,  $\text{CDCl}_3$ ):

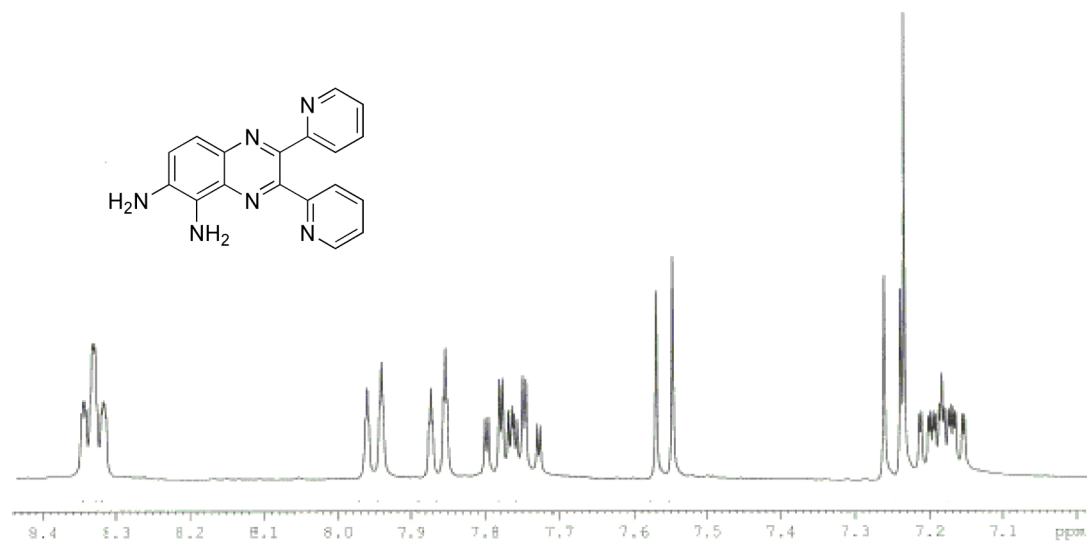

$^{13}\text{C}$  NMR (100 MHz,  $\text{CDCl}_3$ ):

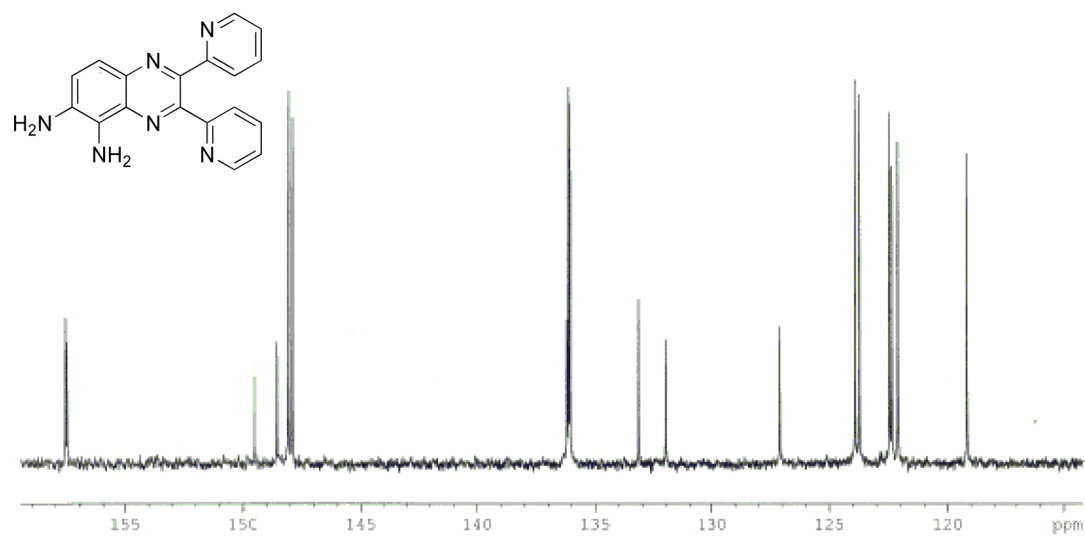

## 2-Ferrocenyl-7,8-Di-(2-pyridyl)-3H-imidazo[4,5-f]quinoxalines, [6b]

$^1\text{H}$  NMR (400MHz,  $\text{CDCl}_3$ ):

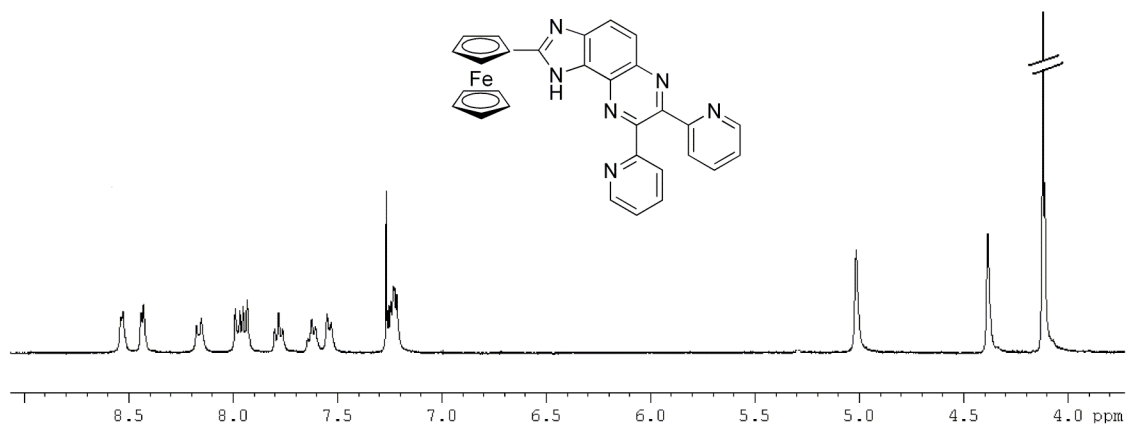

$^{13}\text{C}$  NMR (100 MHz,  $\text{CDCl}_3$ ):

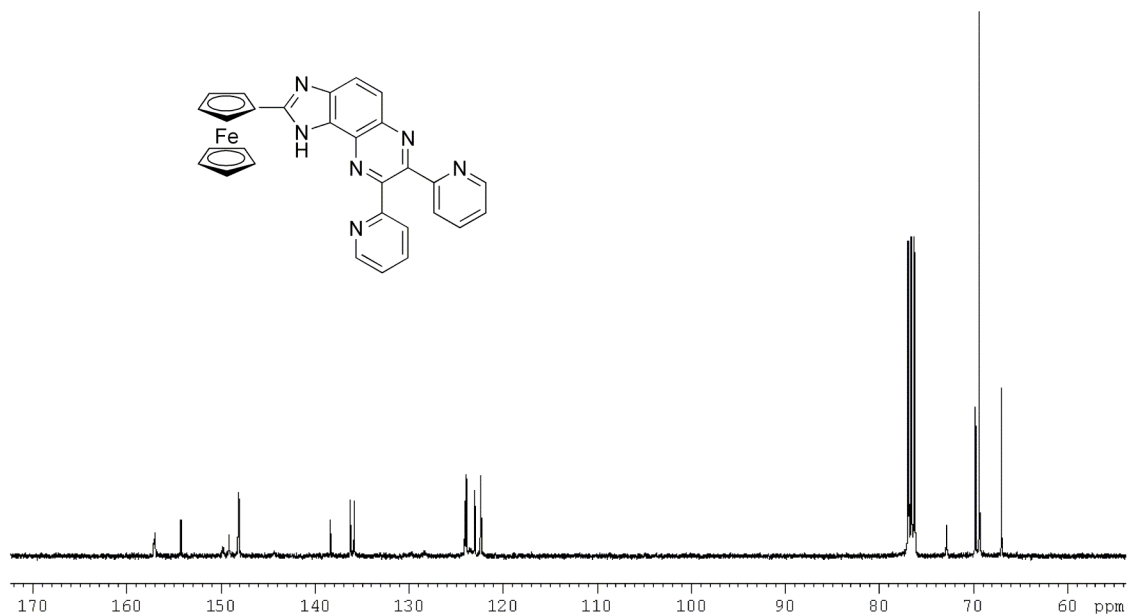

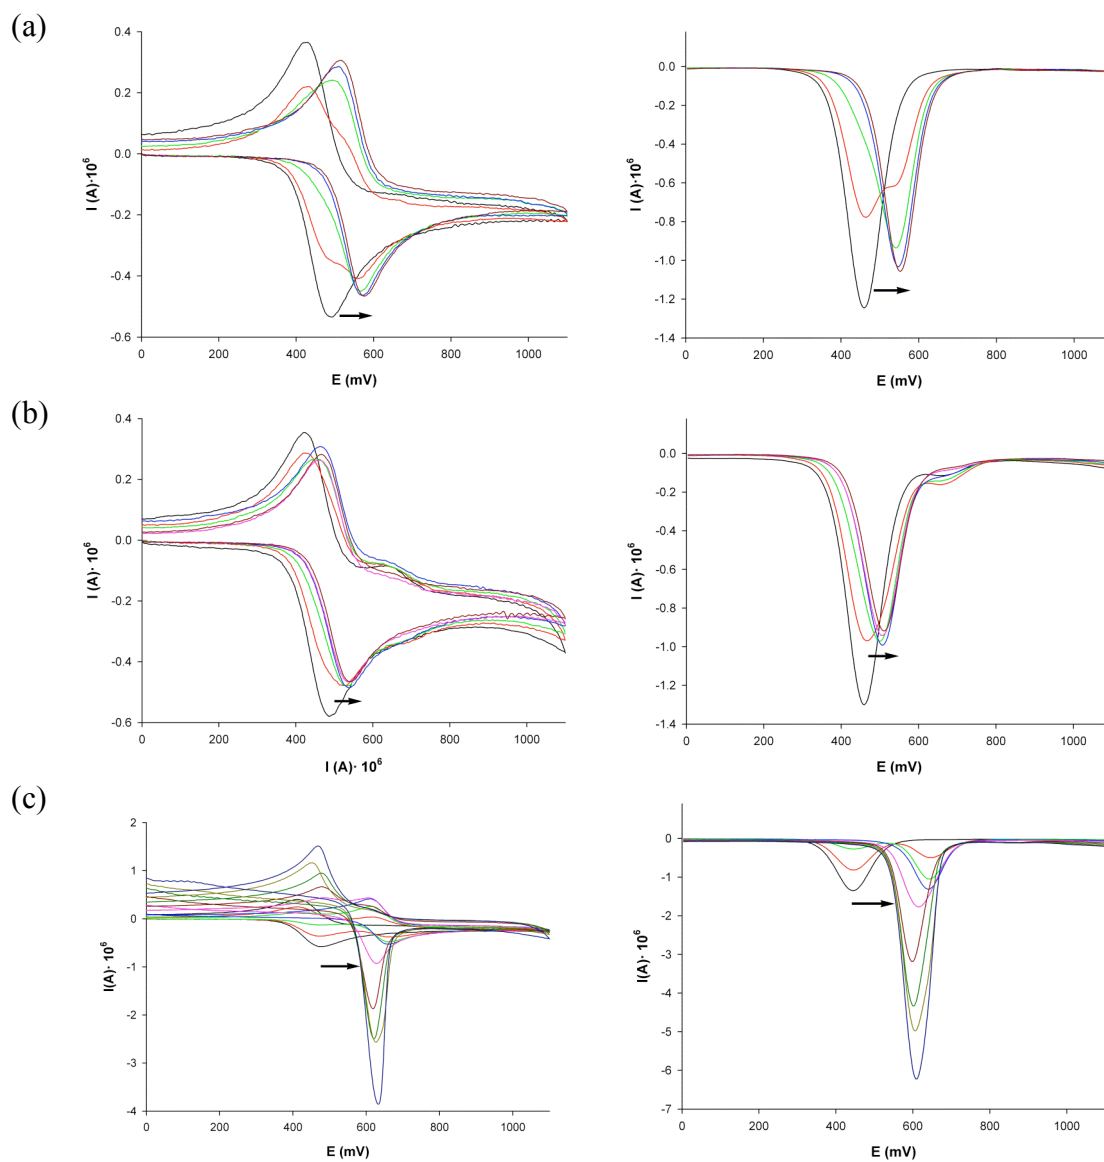

**Figure SI 1.** Evolution of the CV (left) and OSWV (right) of **6a** (1 mM) in  $\text{CH}_3\text{CN}/[(n\text{-Bu})_4\text{ClO}_4]$  scanned at  $0.1 \text{ V s}^{-1}$  in the presence of increasing amounts of: (a)  $\text{Cd}^{2+}$ ; (b)  $\text{Zn}^{2+}$ ; (c)  $\text{Hg}^{2+}$ .



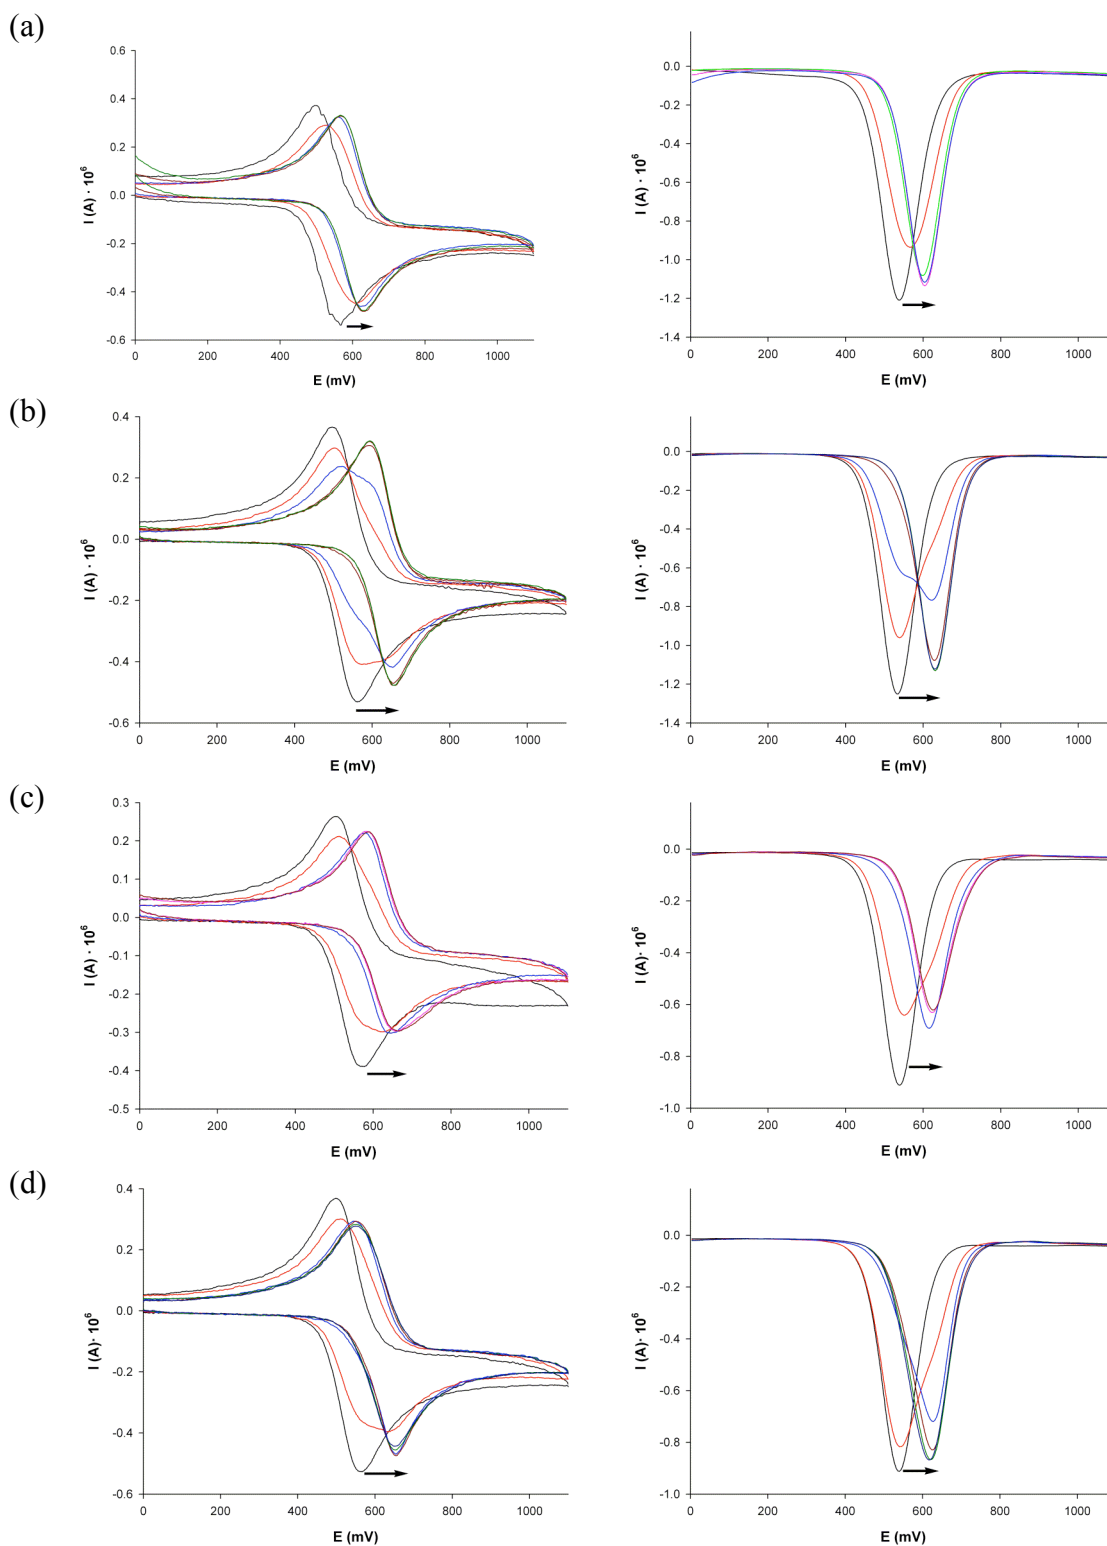

**Figure SI 2.** Evolution of the CV (left) and OSWV (right) of **6b** (1 mM) in CH<sub>3</sub>CN/[*n*-Bu)<sub>4</sub>]ClO<sub>4</sub> scanned at 0.1 V s<sup>-1</sup> in the presence of increasing amounts of: (a) Pb<sup>2+</sup>; (b) Cd<sup>2+</sup>; (c) Zn<sup>2+</sup>; (d) Ni<sup>2+</sup>.

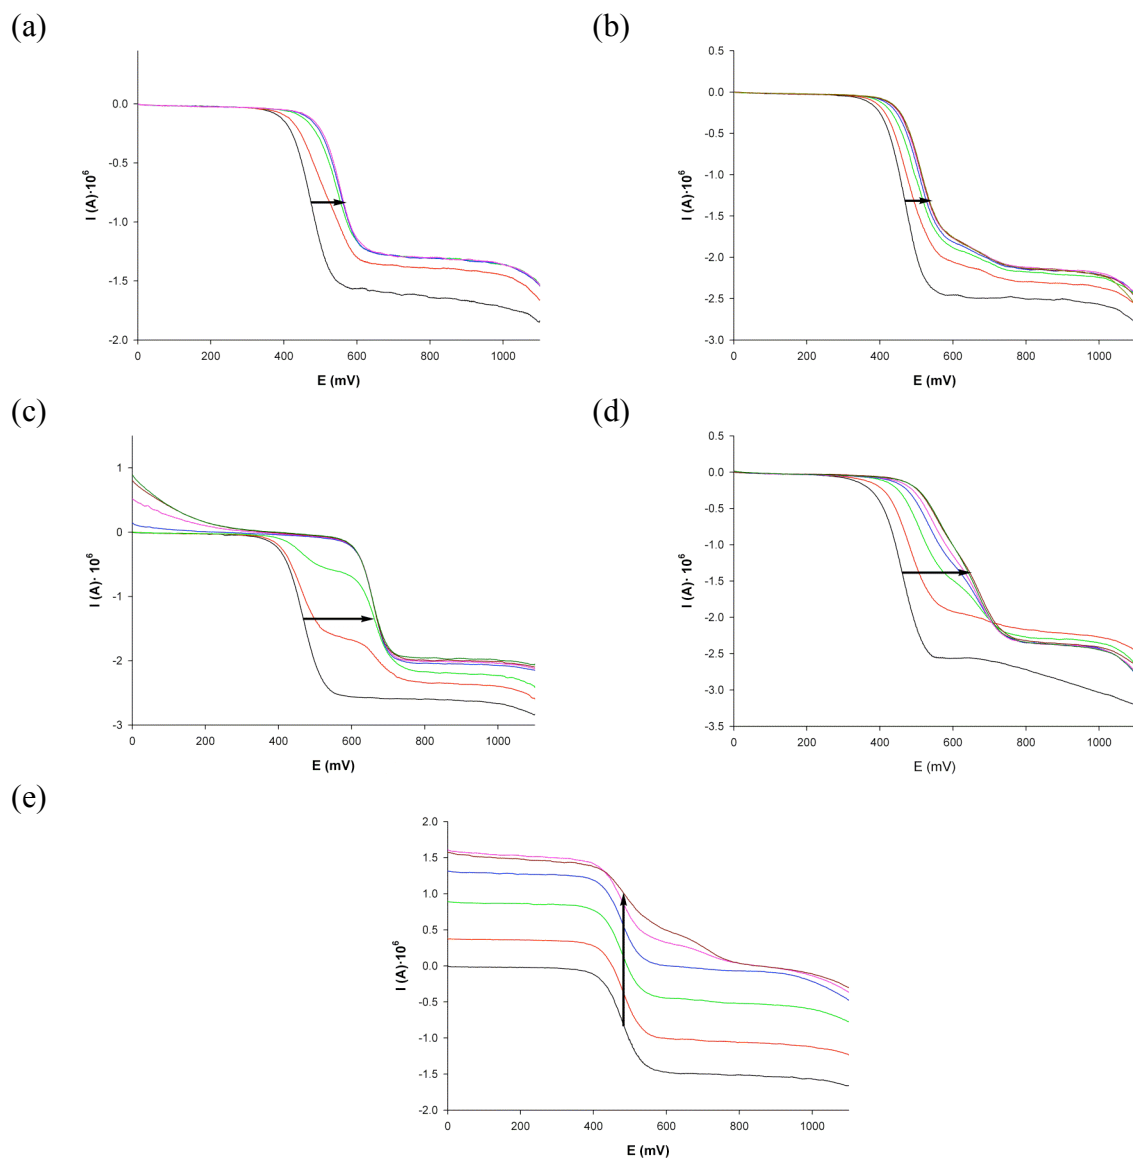

**Figure SI 3.** Evolution of the LSW of **6a** (1mM) in the presence of increasing amounts of (a) Cd<sup>2+</sup>; (b) Cd<sup>2+</sup>; (c) Hg<sup>2+</sup>; (d) Pb<sup>2+</sup>; (e) Cu<sup>2+</sup>, obtained using a rotating disk electrode at 100 mVs<sup>-1</sup> and 1000 rpm and [(*n*-Bu)<sub>4</sub>]ClO<sub>4</sub> 0.1 M as supporting electrolyte.

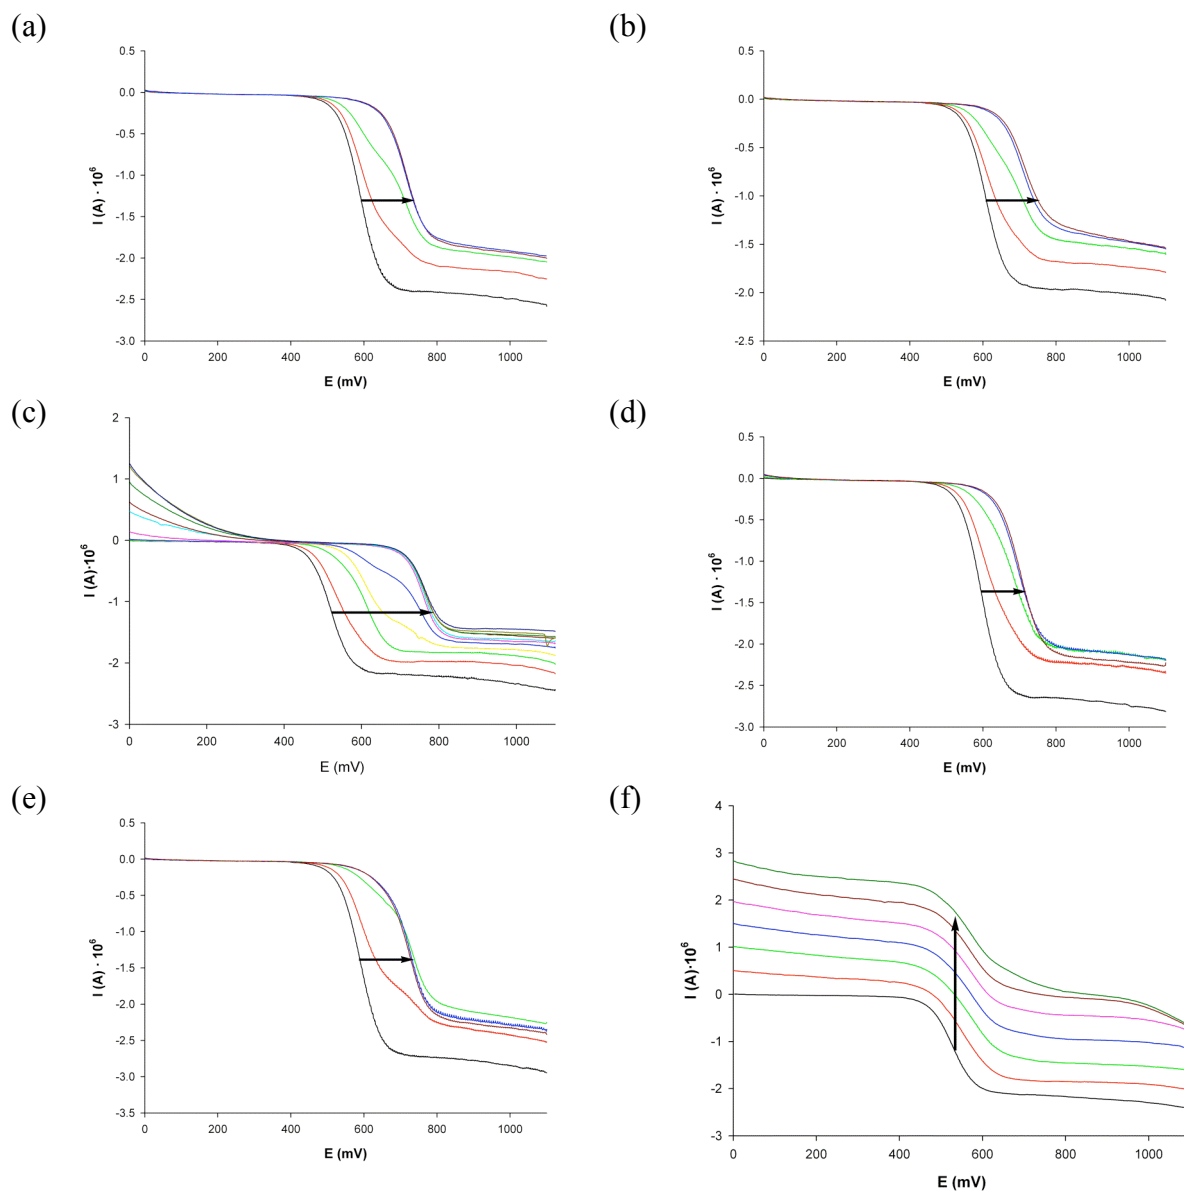

**Figure SI 4.** Evolution of the LSW of **6b** (1mM) in the presence of increasing amounts of (a)  $\text{Cd}^{2+}$ ; (b)  $\text{Zn}^{2+}$ ; (c)  $\text{Hg}^{2+}$ ; (d)  $\text{Pb}^{2+}$ ; (e)  $\text{Ni}^{2+}$ ; (g)  $\text{Cu}^{2+}$ , obtained using a rotating disk electrode at  $100 \text{ mVs}^{-1}$  and 1000 rpm and  $[(n\text{-Bu})_4]\text{ClO}_4$  0.1 M as supporting electrolyte.

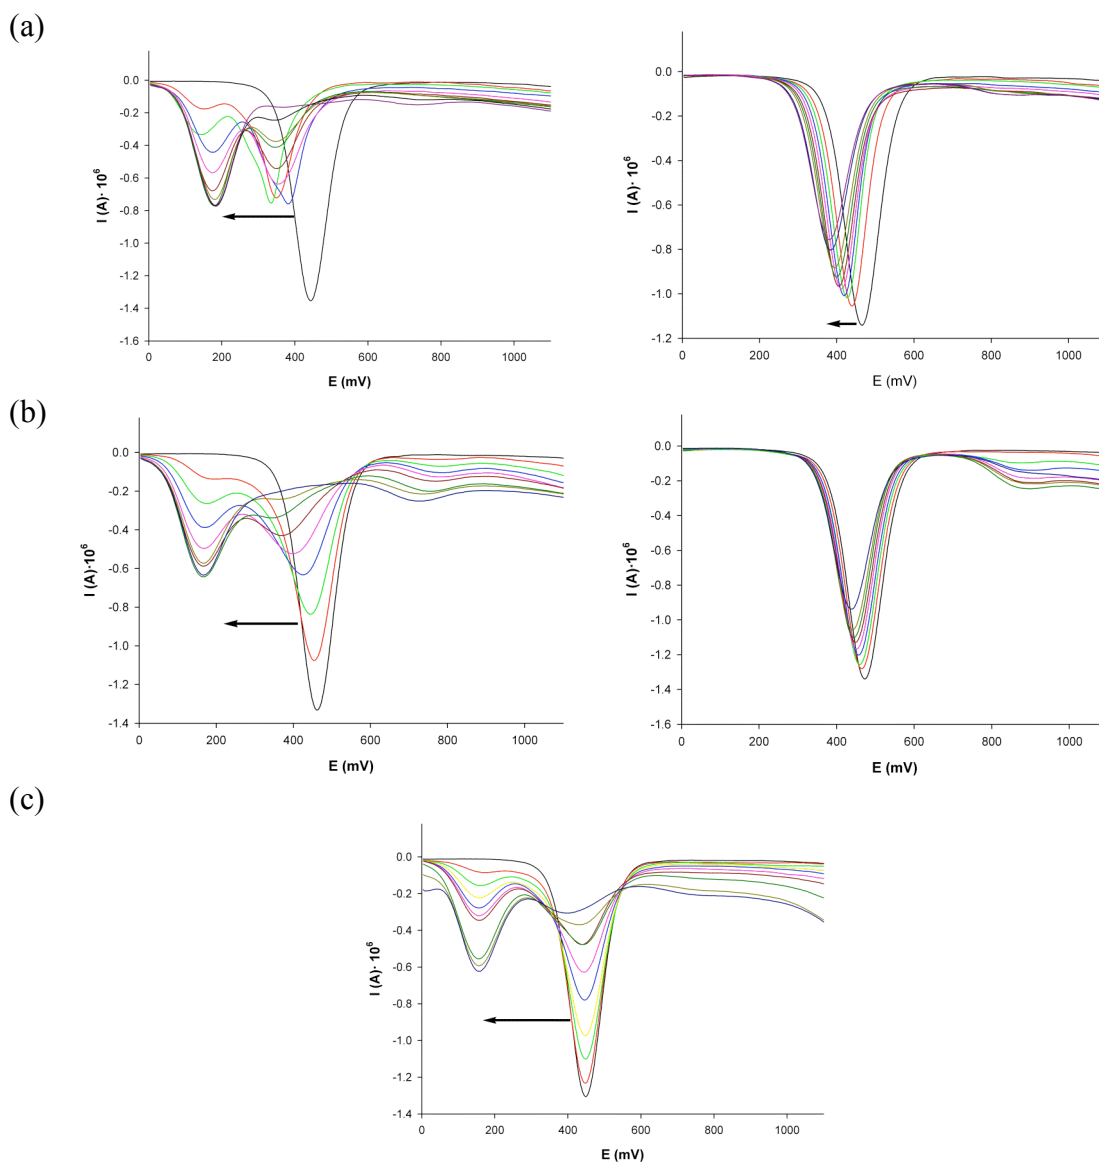

**Figure SI 5.** (a) Evolution of the OSWV of **6a** (1 mM) in CH<sub>3</sub>CN/[*n*-Bu)<sub>4</sub>]ClO<sub>4</sub> scanned at 0.1 V s<sup>-1</sup> in the presence of increasing amounts of (a) HP<sub>2</sub>O<sub>7</sub><sup>3-</sup> (left) until 2 equiv and in the presence of 2 equiv of HP<sub>2</sub>O<sub>7</sub><sup>3-</sup> and 20 equiv of acetic acid in CH<sub>3</sub>CN (right); (b) F<sup>-</sup> (left) until 2 equiv and in the presence of 2 equiv of F<sup>-</sup> and 20 equiv of acetic acid in CH<sub>3</sub>CN (right). (c) Evolution of the OSWV of **6a** (1 mM) in CH<sub>3</sub>CN/[*n*-Bu)<sub>4</sub>]ClO<sub>4</sub> scanned at 0.1 V s<sup>-1</sup> in the presence of increasing amounts of OH<sup>-</sup> until 2 equiv.

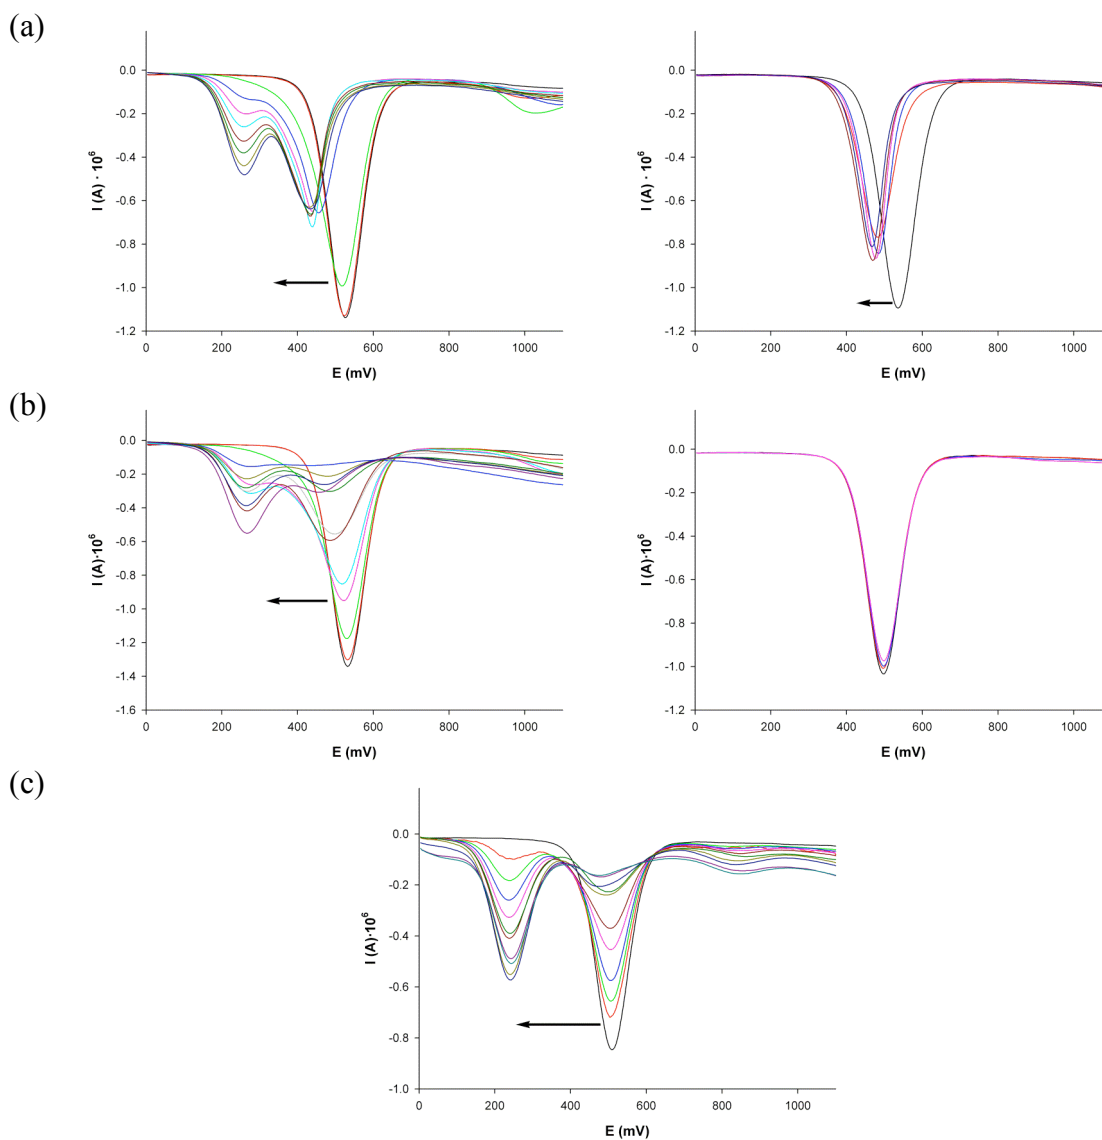

**Figure SI 6.** (a) Evolution of the OSWV of **6b** (1 mM) in CH<sub>3</sub>CN/[*n*-Bu<sub>4</sub>]<sub>4</sub>ClO<sub>4</sub> scanned at 0.1 V s<sup>-1</sup> in the presence of increasing amounts of (a) HP<sub>2</sub>O<sub>7</sub><sup>3-</sup> (left) until 2 equiv and in the presence of 2 equiv of HP<sub>2</sub>O<sub>7</sub><sup>3-</sup> and 20 equiv of acetic acid in CH<sub>3</sub>CN (right); (b) F<sup>-</sup> (left) until 2 equiv and in the presence of 2 equiv of F<sup>-</sup> and 20 equiv of acetic acid in CH<sub>3</sub>CN (right). (c) Evolution of the OSWV of **6b** (1 mM) in CH<sub>3</sub>CN/[*n*-Bu<sub>4</sub>]<sub>4</sub>ClO<sub>4</sub> scanned at 0.1 V s<sup>-1</sup> in the presence of increasing amounts of OH<sup>-</sup> until 2 equiv.

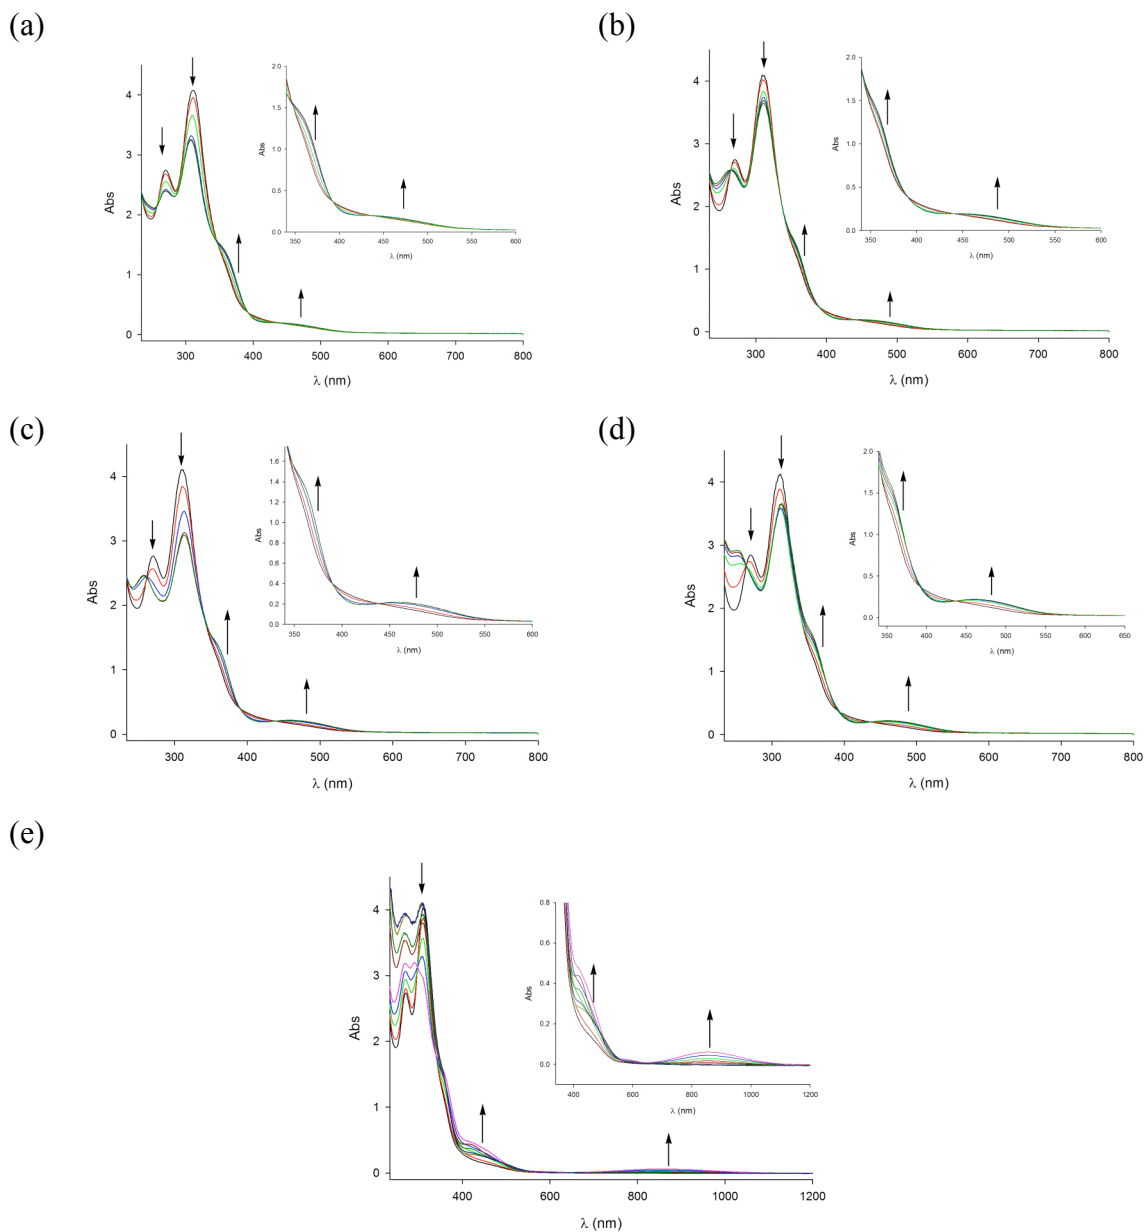

**Figure SI 7.** Changes in the absorption spectra of **6a** ( $c = 1 \cdot 10^{-4}$  M in  $\text{CH}_3\text{CN}$ ) upon addition of increasing amounts of (a)  $\text{Cd}^{2+}$ ; (b)  $\text{Zn}^{2+}$ ; (c)  $\text{Hg}^{2+}$ ; (d)  $\text{Pb}^{2+}$ ; (e)  $\text{Cu}^{2+}$  metal cation, until 1 equiv was added. Arrows indicate absorptions that increase or decrease during the experiment.

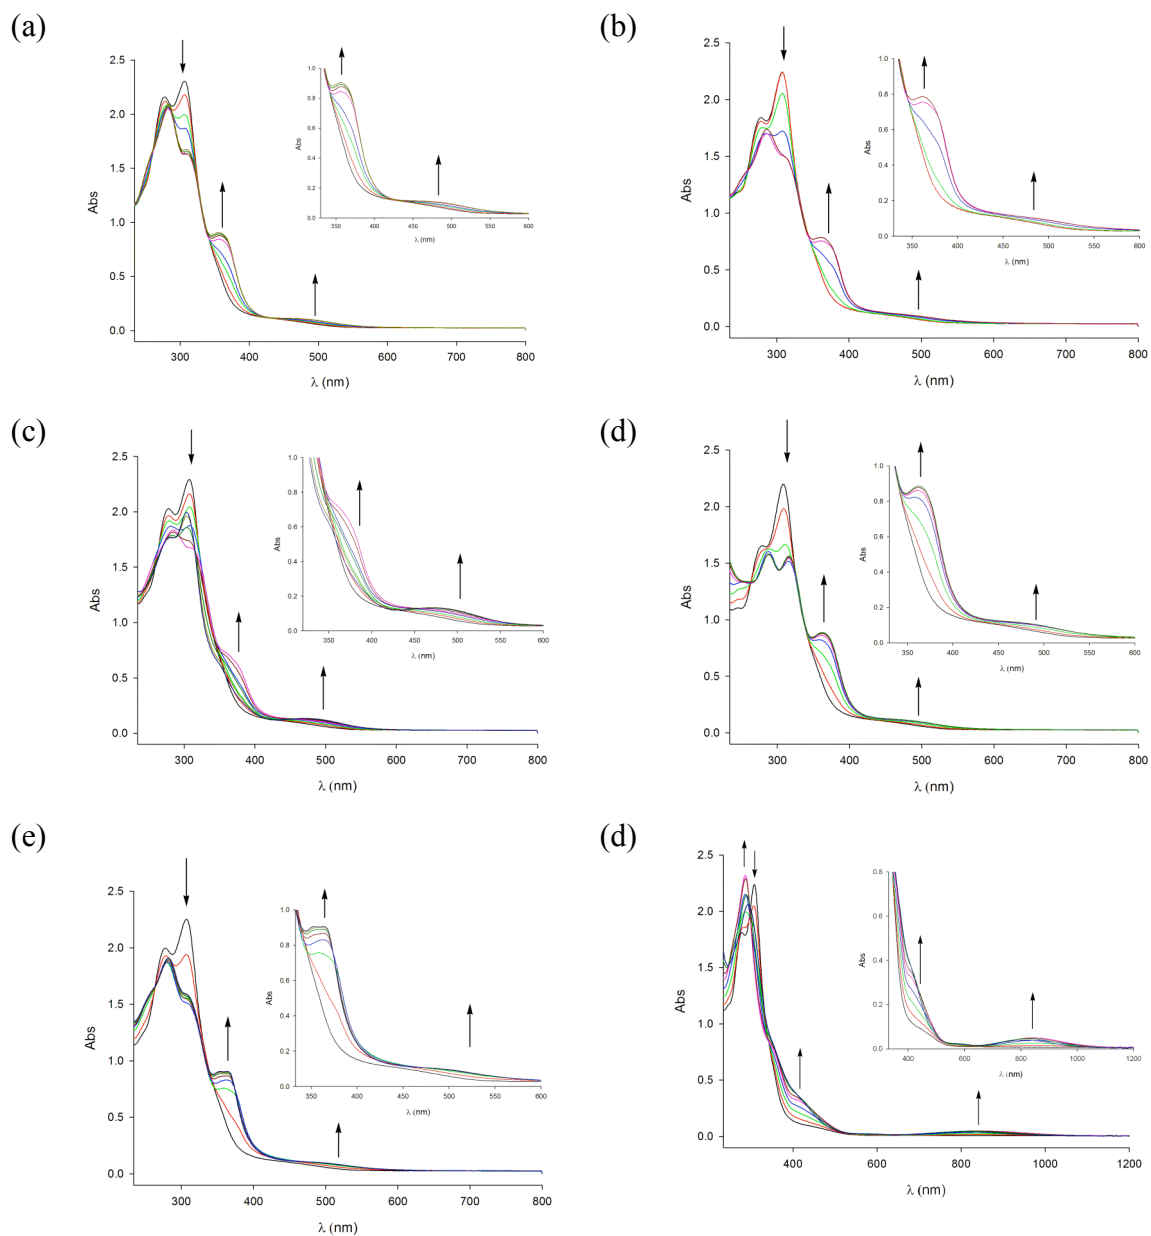

**Figure SI 8.** Changes in the absorption spectra of **6b** ( $c = 5 \cdot 10^{-5}$  M in  $\text{CH}_3\text{CN}$ ) upon addition of increasing amounts of (a)  $\text{Cd}^{2+}$ ; (b)  $\text{Zn}^{2+}$ ; (c)  $\text{Hg}^{2+}$ ; (d)  $\text{Pb}^{2+}$ ; (e)  $\text{Ni}^{2+}$ ; (d)  $\text{Cu}^{2+}$  metal cation, until 1 equiv was added. Arrows indicate absorptions that increase or decrease during the experiment.

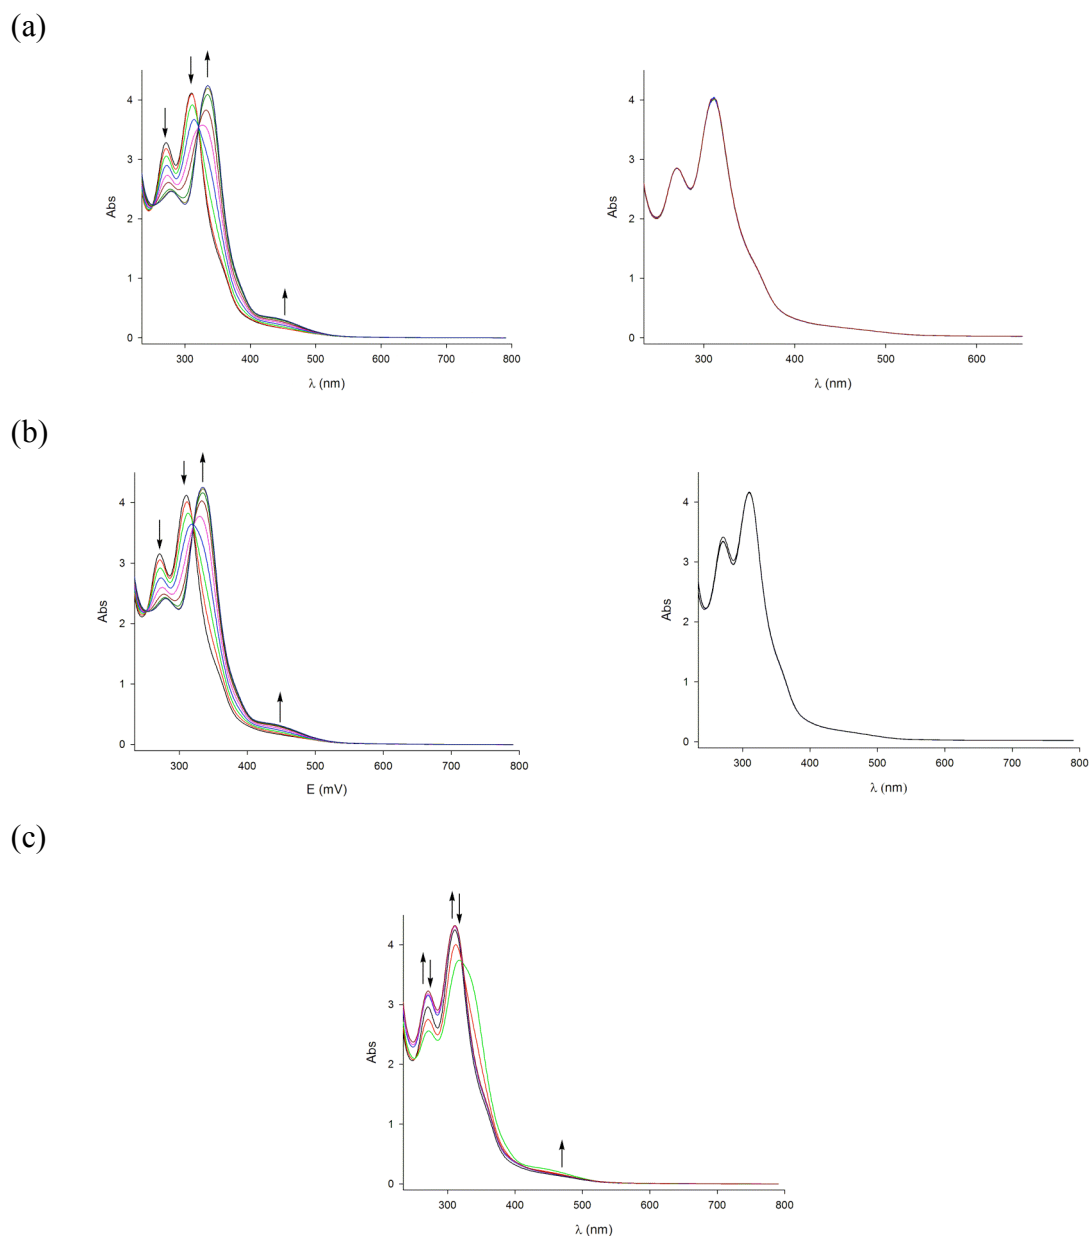

**Figure SI 9.** Changes in the absorption spectra of **6a** ( $c = 1 \cdot 10^{-4} \text{ M}$  in  $\text{CH}_3\text{CN}$ ) upon addition of increasing amounts of (a)  $\text{HP}_2\text{O}_7^{3-}$  anion; (b)  $\text{F}^-$  anion, until 2 equiv (left) and in the present of 20 equiv of acetic acid (right). (c) Changes in the absorption spectra of **6a** ( $c = 1 \cdot 10^{-4} \text{ M}$  in  $\text{CH}_3\text{CN}$ ) upon addition of increasing amounts of (a)  $\text{OH}^-$  anion. Arrows indicate absorptions that increase or decrease during the experiment.



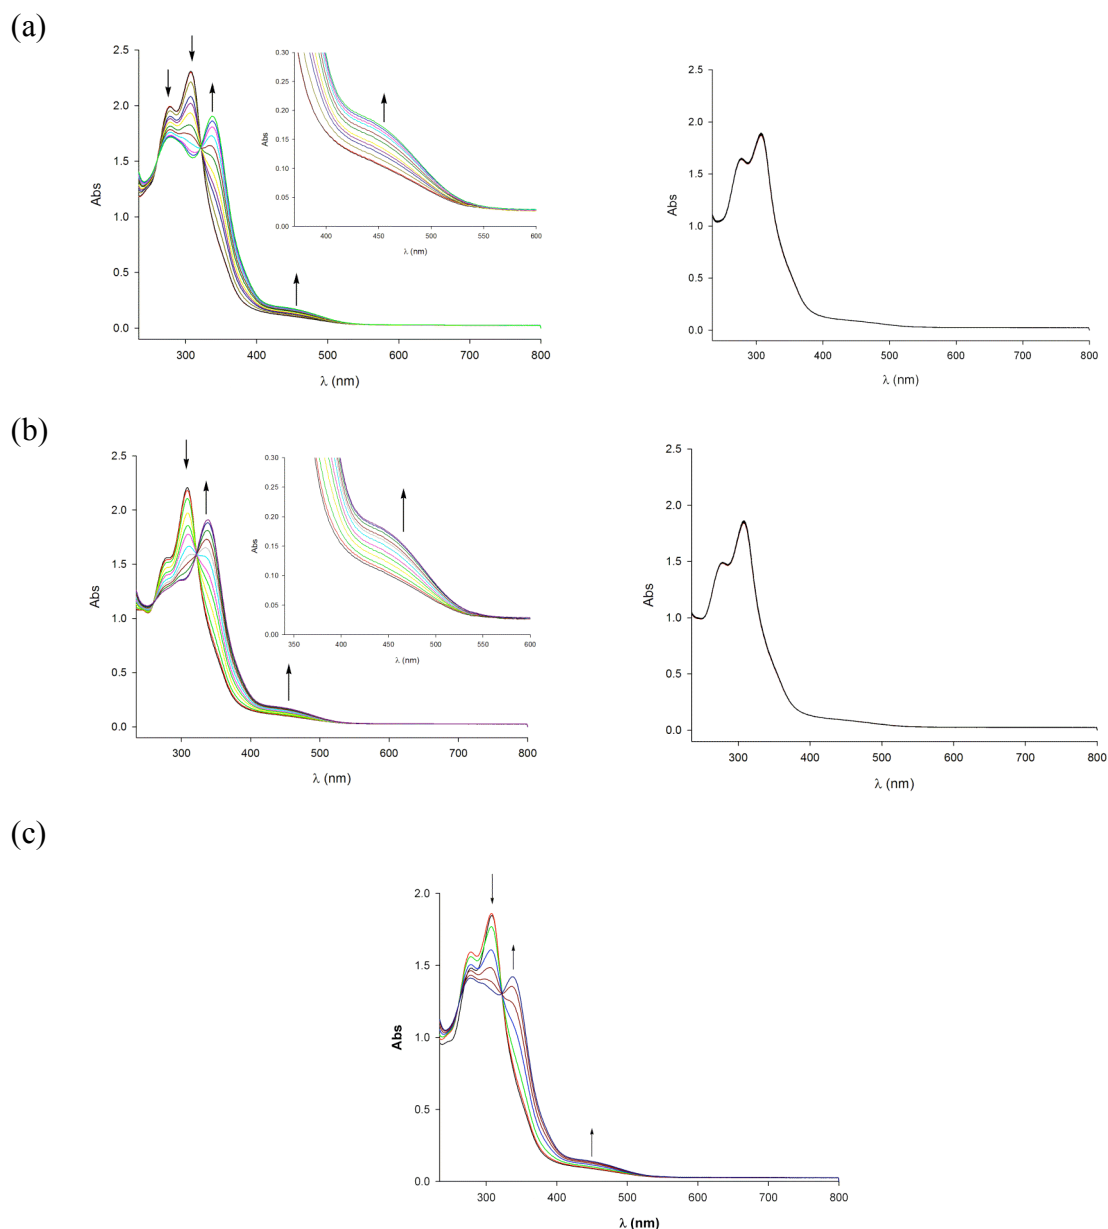

**Figure SI 10.** Changes in the absorption spectra of **6b** ( $c = 1 \cdot 10^{-4} \text{ M}$  in  $\text{CH}_3\text{CN}$ ) upon addition of increasing amounts of (a)  $\text{HP}_2\text{O}_7^{3-}$  anion; (b)  $\text{F}^-$  anion, until 2 equiv (left) and in the present of 20 equiv of acetic acid (right). (c) Changes in the absorption spectra of **6b** ( $c = 1 \cdot 10^{-4} \text{ M}$  in  $\text{CH}_3\text{CN}$ ) upon addition of increasing amounts of (a)  $\text{OH}^-$  anion. Arrows indicate absorptions that increase or decrease during the experiment.

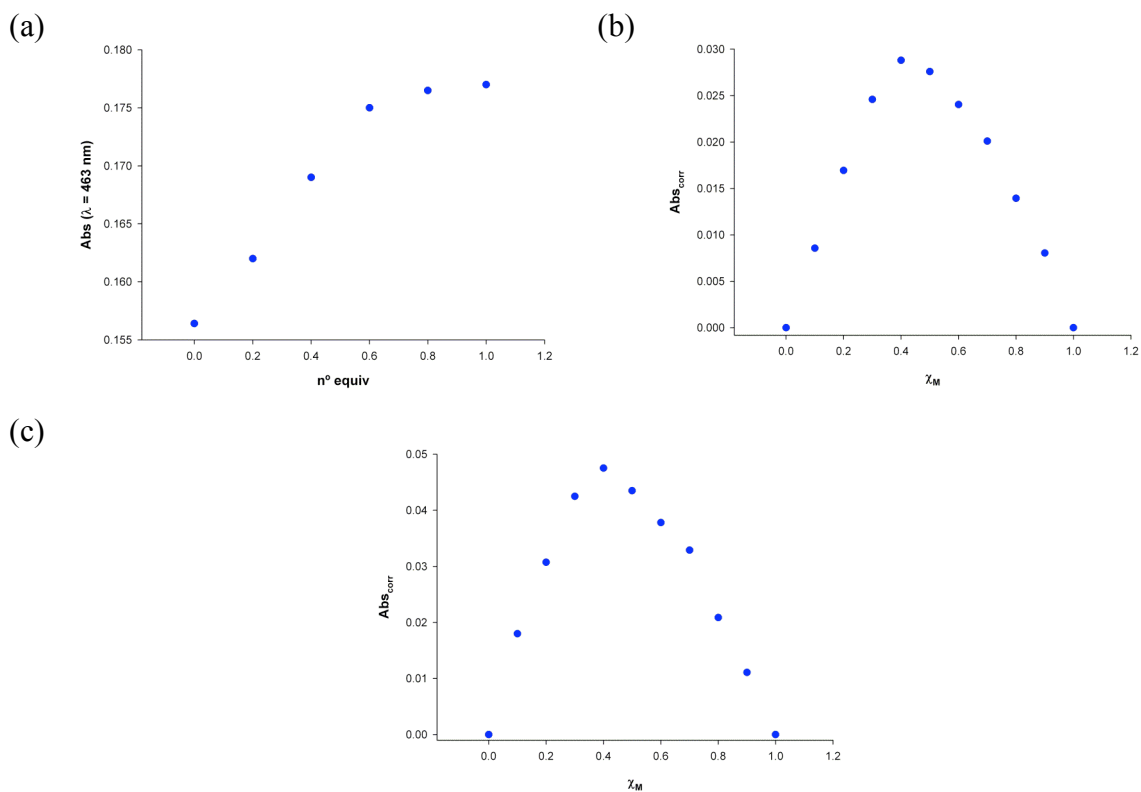

**Figure SI 11.** (a) Titration profile showing the change in absorbance of **6a** ( $c = 1 \cdot 10^{-4} \text{ M}$  in  $\text{CH}_3\text{CN}$ ), at  $\lambda = 463 \text{ nm}$ , upon addition of  $\text{Cd}^{2+}$ , indicating the formation of 2:1 complex. (b) Job's plot for **6a** ( $1 \times 10^{-4} \text{ M}$  in  $\text{CH}_3\text{CN}$ ) and  $\text{Zn}^{2+}$ , indicating the formation of a 2:1 complex. (c) Job's plot for **6a** ( $1 \times 10^{-4} \text{ M}$  in  $\text{CH}_3\text{CN}$ ) and  $\text{Hg}^{2+}$  ( $1 \times 10^{-4} \text{ M}$  in  $\text{CH}_3\text{CN}$ ), indicating the formation of a 2:1 complex.

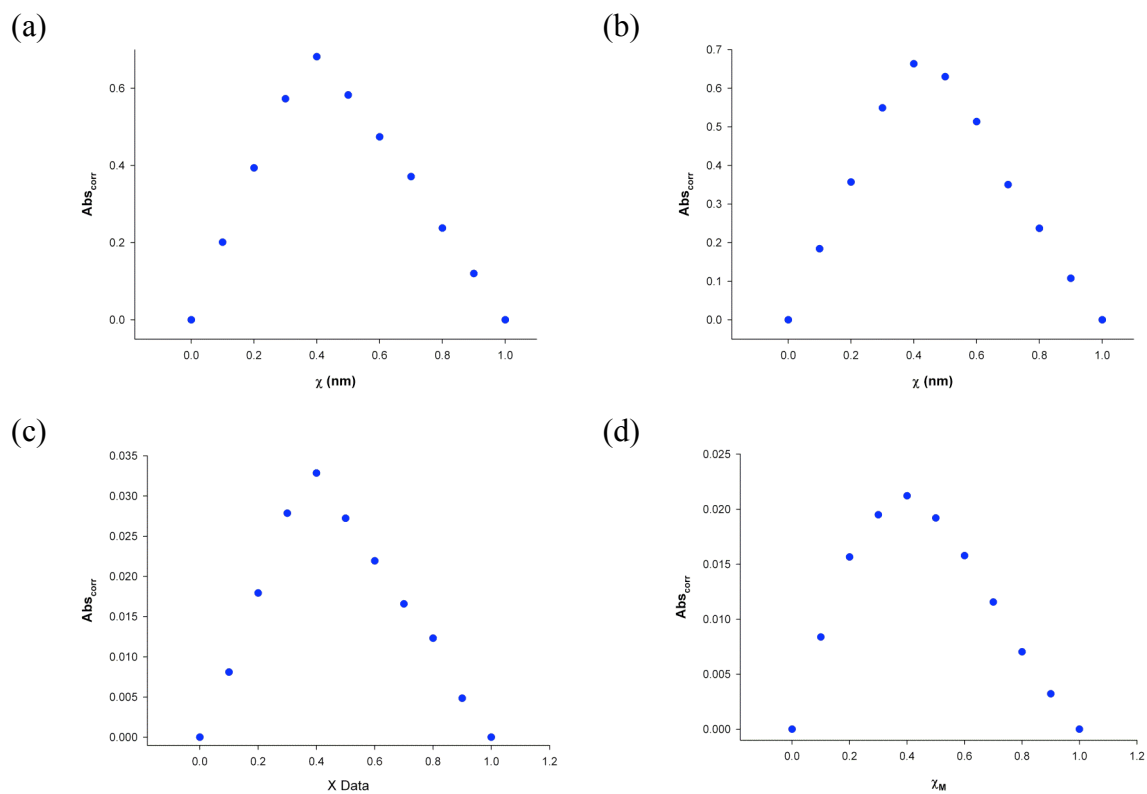

**Figure SI 12.** Job's plot for **6b** ( $1 \times 10^{-4}$  M in CH<sub>3</sub>CN), and (a) Cd<sup>2+</sup>; (b) Zn<sup>2+</sup>; (c) Pb<sup>2+</sup>; (d) Ni<sup>2+</sup> ( $1 \times 10^{-5}$  M in CH<sub>3</sub>CN), indicating the formation of 2:1 complexes.

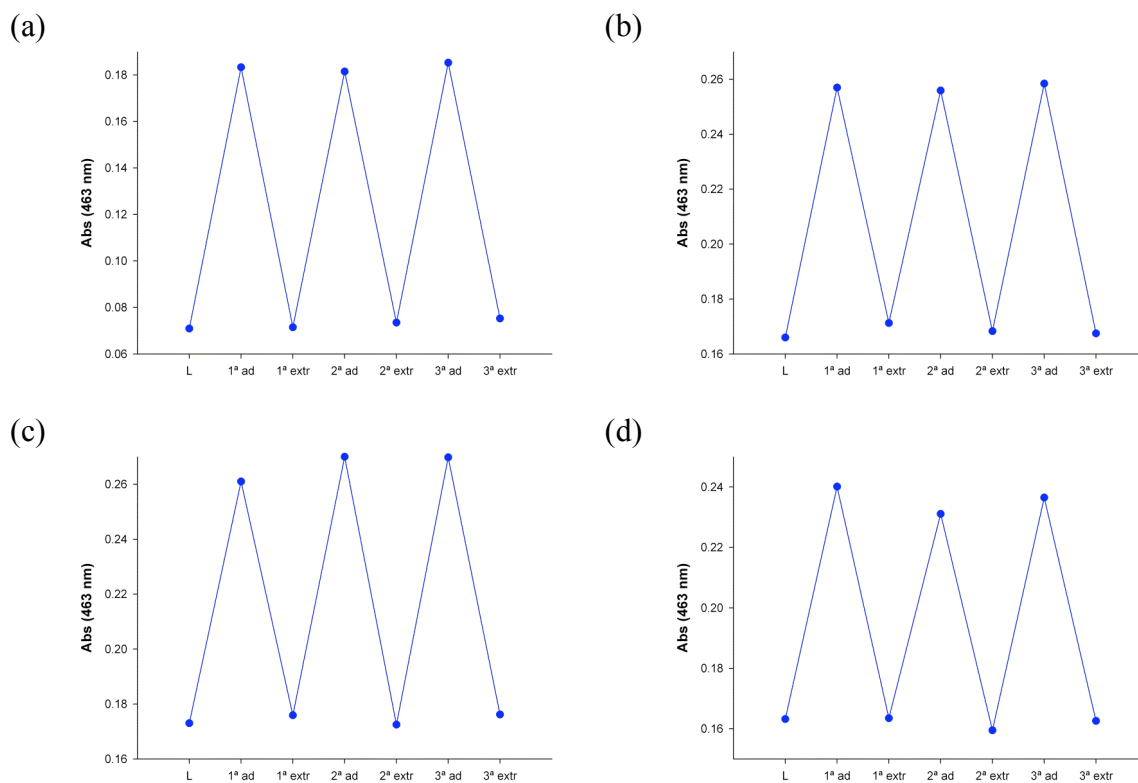

**Figure SI 13.** Stepwise complexation [by addition of (a) Cd<sup>2+</sup>; (b) Zn<sup>2+</sup>; (c) Hg<sup>2+</sup>; (d) Pb<sup>2+</sup>]/decomplexation (extraction with H<sub>2</sub>O) cycles of ligand **6a** ( $c = 1 \times 10^{-4} \text{M}$  in CH<sub>2</sub>Cl<sub>2</sub>) carried out by UV/Vis analysis.

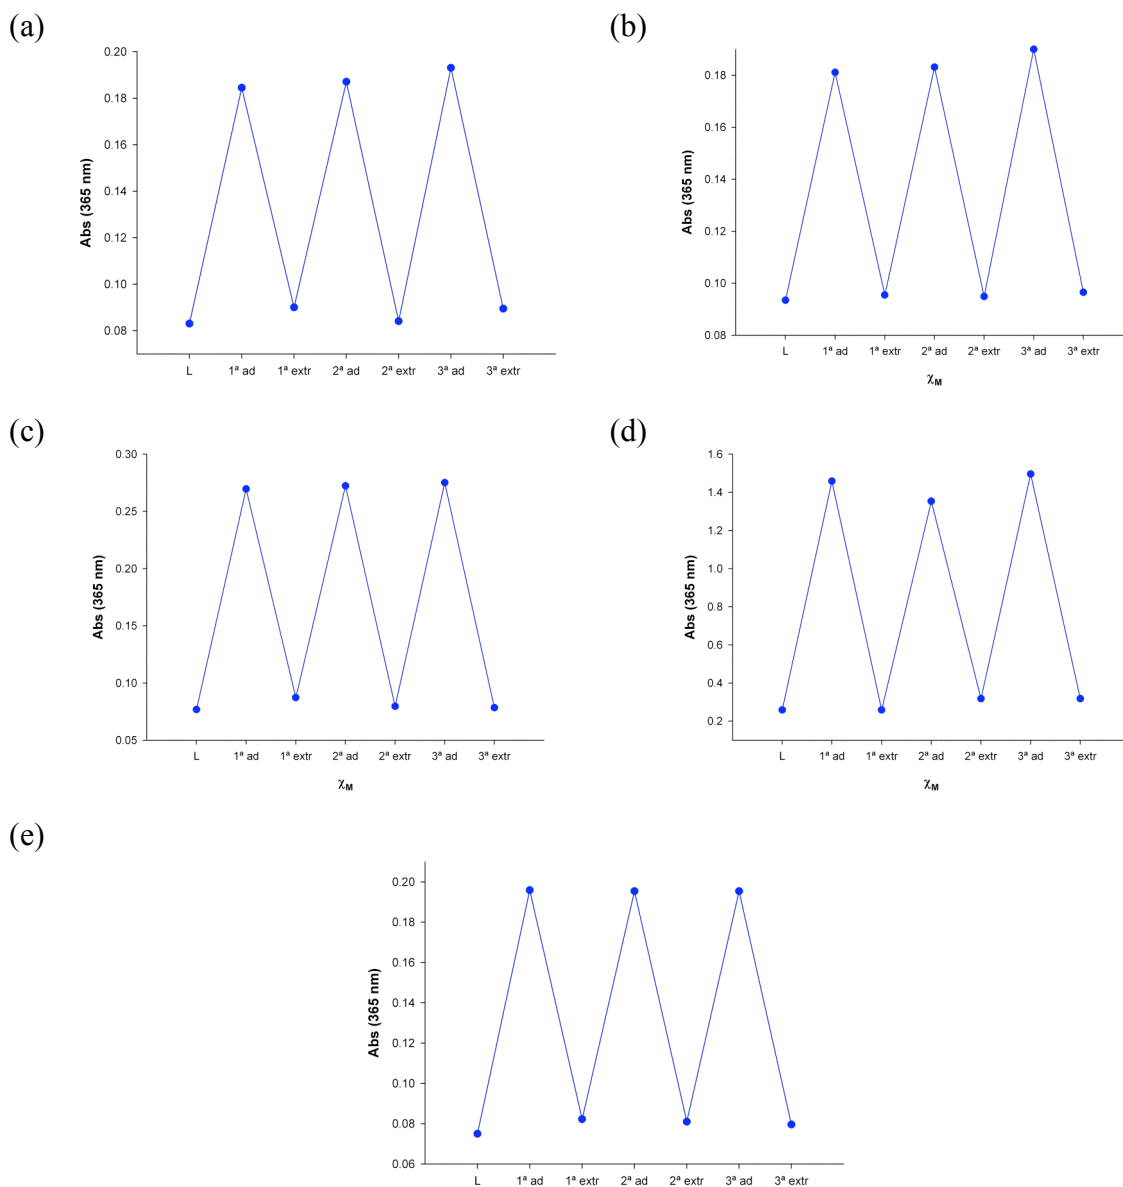

**Figure SI 14.** Stepwise complexation [addition of (a)  $\text{Cd}^{2+}$ ; (b)  $\text{Zn}^{2+}$ ; (c)  $\text{Hg}^{2+}$ ; (d)  $\text{Pb}^{2+}$ ; (e)  $\text{Ni}^{2+}$ ]/decomplexation (extraction with  $\text{H}_2\text{O}$ ) cycles of ligand **6b** ( $c = 1 \times 10^{-4} \text{M}$  in  $\text{CH}_2\text{Cl}_2$ ) carried out by UV/Vis analysis.

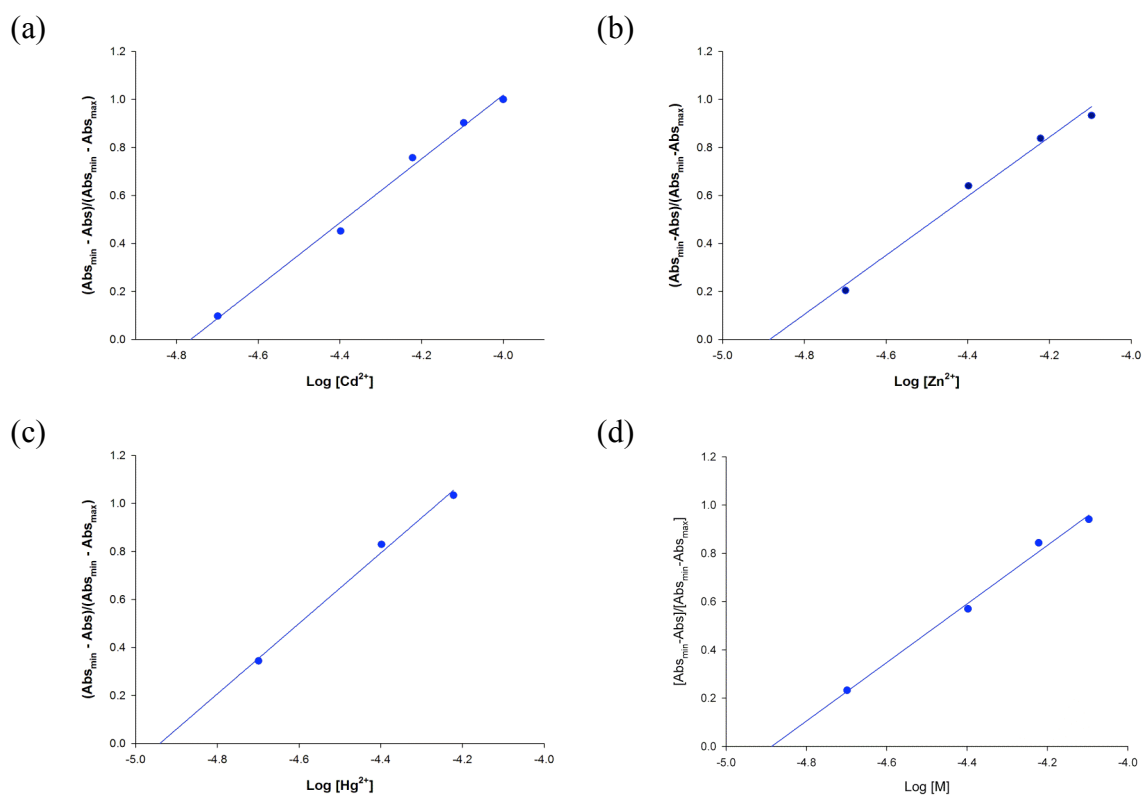

**Figure SI 15.** Absorbance of **6a** ( $c = 1 \cdot 10^{-4}$  M in  $CH_3CN$ ) at each concentration of cation added (a)  $Cd^{2+}$ ; (b)  $Zn^{2+}$ ; (c)  $Hg^{2+}$ ; (d)  $Pb^{2+}$ , normalized between the minimum absorbance, found at zero equiv of metal cation; and the maximum absorbance, found at (a)  $[Cd^{2+}] = 1.72 \cdot 10^{-5}$  M; (b)  $[Zn^{2+}] = 1.31 \cdot 10^{-5}$  M; (c)  $[Hg^{2+}] = 1.15 \cdot 10^{-5}$  M; (d)  $[Pb^{2+}] = 1.30 \cdot 10^{-5}$  M.

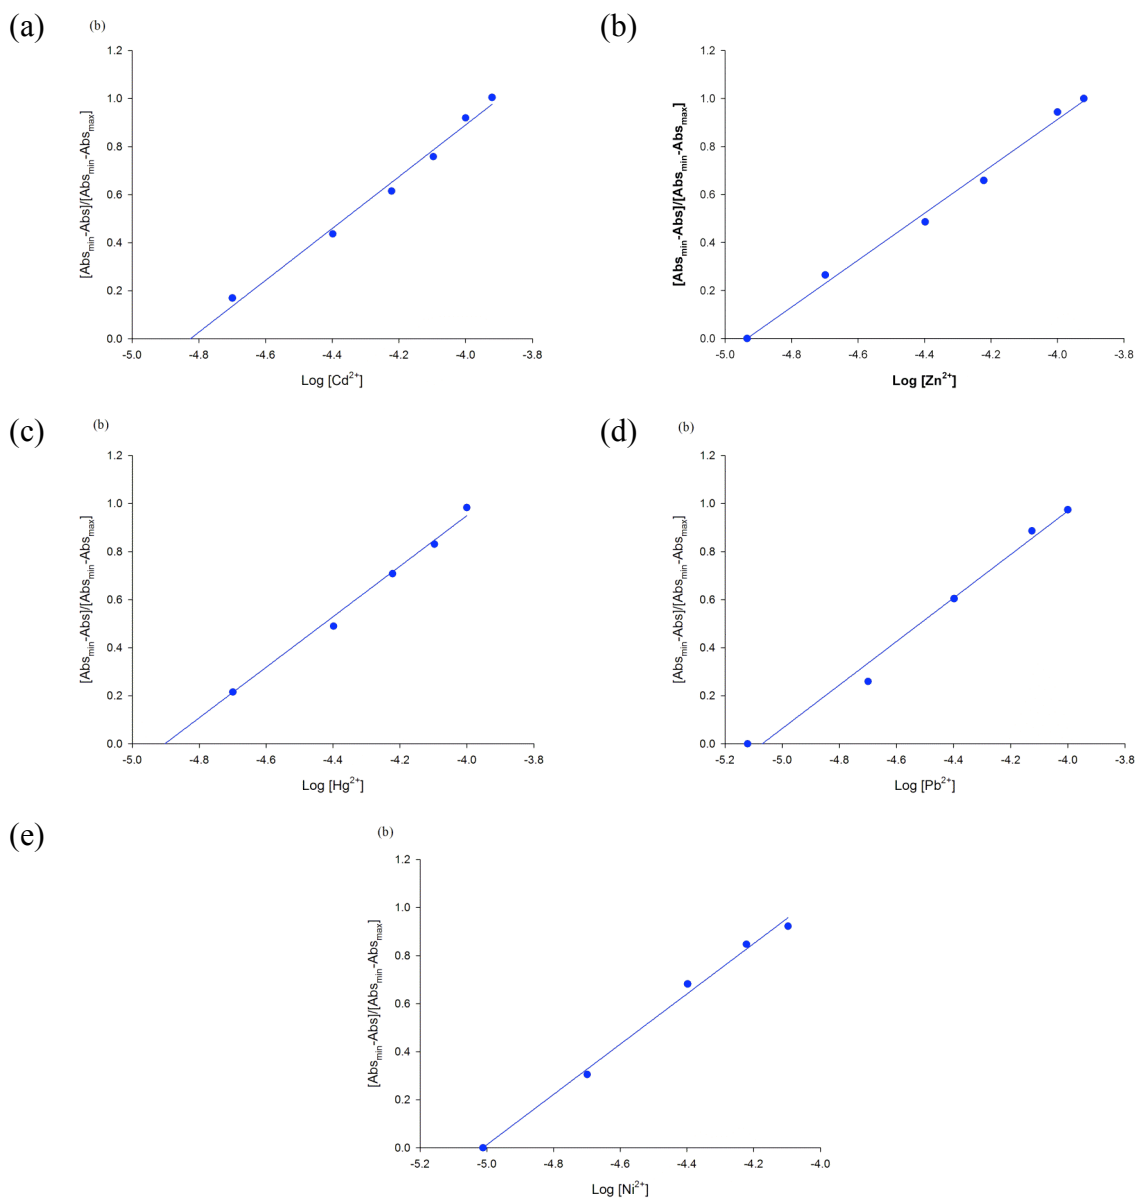

**Figure SI 16.** Absorbance of **6b** ( $c = 1 \cdot 10^{-4}$  M in  $\text{CH}_3\text{CN}$ ) at each concentration of cation added (a)  $\text{Cd}^{2+}$ ; (b)  $\text{Zn}^{2+}$ ; (c)  $\text{Hg}^{2+}$ ; (d)  $\text{Pb}^{2+}$ ; (e)  $\text{Ni}^{2+}$  normalized between the minimum absorbance, found at zero equiv of metal cation; and the maximum absorbance, found at (a)  $[\text{Cd}^{2+}] = 1.50 \cdot 10^{-5}$  M; (b)  $[\text{Zn}^{2+}] = 1.16 \cdot 10^{-5}$  M; (c)  $[\text{Hg}^{2+}] = 1.25 \cdot 10^{-5}$  M; (d)  $[\text{Pb}^{2+}] = 7.58 \cdot 10^{-6}$  M; (e)  $[\text{Ni}^{2+}] = 9.74 \cdot 10^{-6}$  M.

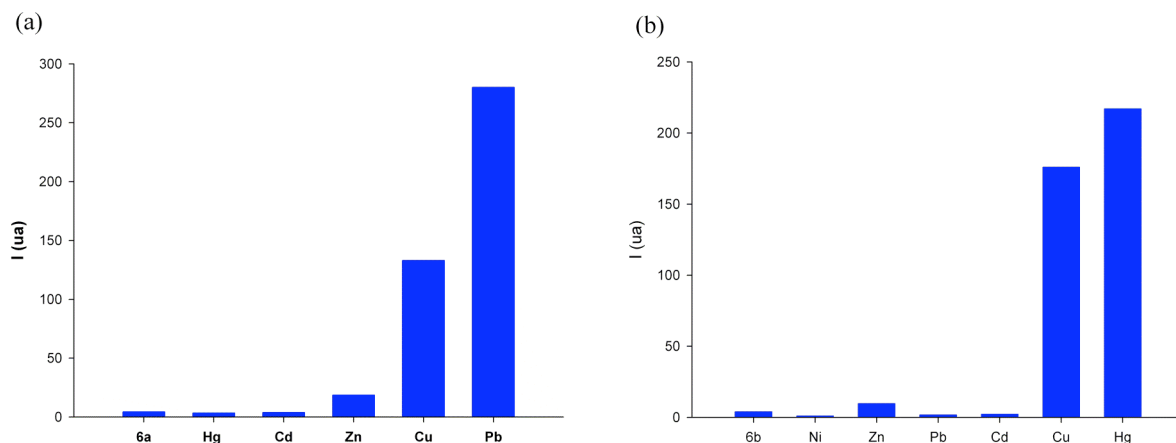

**Figure SI 17.** Fluorescence intensity of ligand (a) **6a**; (b) **6b**, in  $\text{CH}_3\text{CN}$ , after addition of 1 equiv of several cations. Emission monitored at (a)  $\lambda_{\text{exc}} = 330$  nm; (b)  $\lambda_{\text{exc}} = 310$  nm.

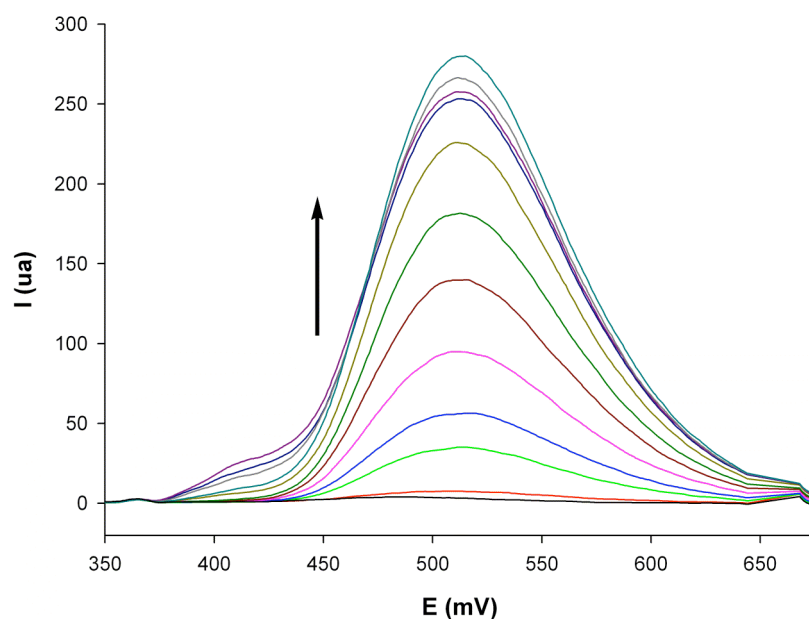

**Figure SI 18.** Changes in the fluorescence emission spectrum of **6a** ( $c = 1 \times 10^{-5}$  M in  $\text{CH}_3\text{CN}$ ) upon titration with  $\text{Pb}^{2+}$ : the initial (black) is that of **6a** and the final one (deep cyan), after addition of 1.4 equiv of  $\text{Pb}^{2+}$  ( $c = 2.5 \times 10^{-3}$  M in  $\text{CH}_3\text{CN}$ ). Emission is monitored at  $\lambda_{\text{exc}} = 330$  nm.



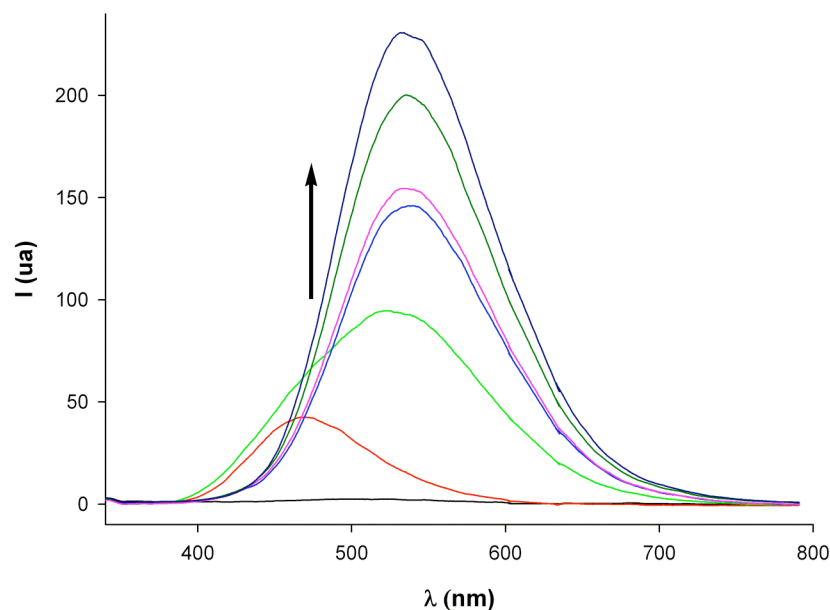

**Figure SI 19.** Changes in the fluorescence emission spectrum of **6b** ( $c = 1 \times 10^{-5}$  M in CH<sub>3</sub>CN) upon titration with Hg<sup>2+</sup>: the initial (black) is that of **6b** and the final one (deep blue), after addition of 1.2 equiv of Hg<sup>2+</sup> ( $c = 2.5 \times 10^{-3}$  M in CH<sub>3</sub>CN). Emission is monitored at  $\lambda_{\text{exc}} = 310$  nm.

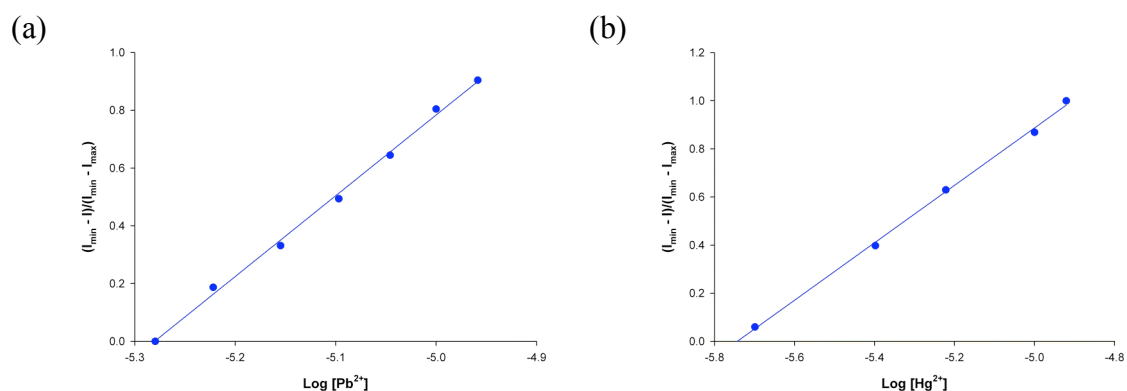

**Figure SI 20.** Fluorescence intensity of (a) **6a**; (b) **6b** ( $1 \times 10^{-5}$  M in CH<sub>3</sub>CN), at each concentration of (a) Pb<sup>2+</sup>; (b) Hg<sup>2+</sup> added, normalized between the minimum fluorescence intensity, found at zero equiv of cation, and the maximum fluorescence intensity, found at (a) [Pb<sup>2+</sup>]=  $5.25 \times 10^{-6}$  M; (b) [Hg<sup>2+</sup>]=  $1.81 \times 10^{-6}$  M.

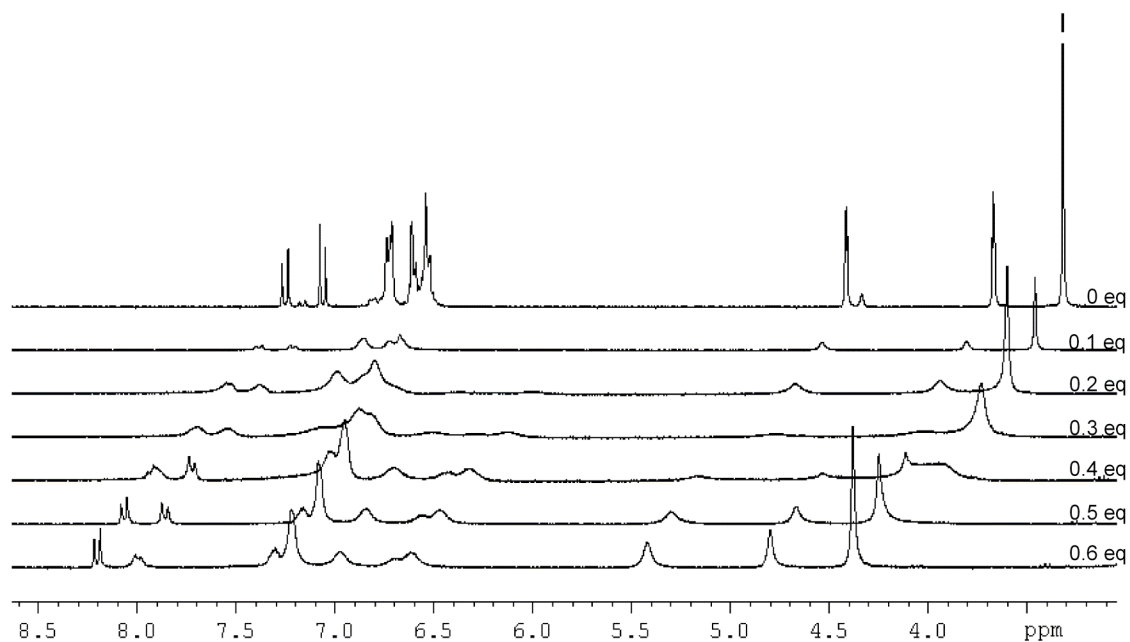

**Figure SI 21.** Changes in the <sup>1</sup>H-NMR (in acetone-d<sub>6</sub>) spectrum of **6a** (top) in acetone upon addition of increasing amounts of Cd<sup>2+</sup> until 0.6 equiv (bottom).

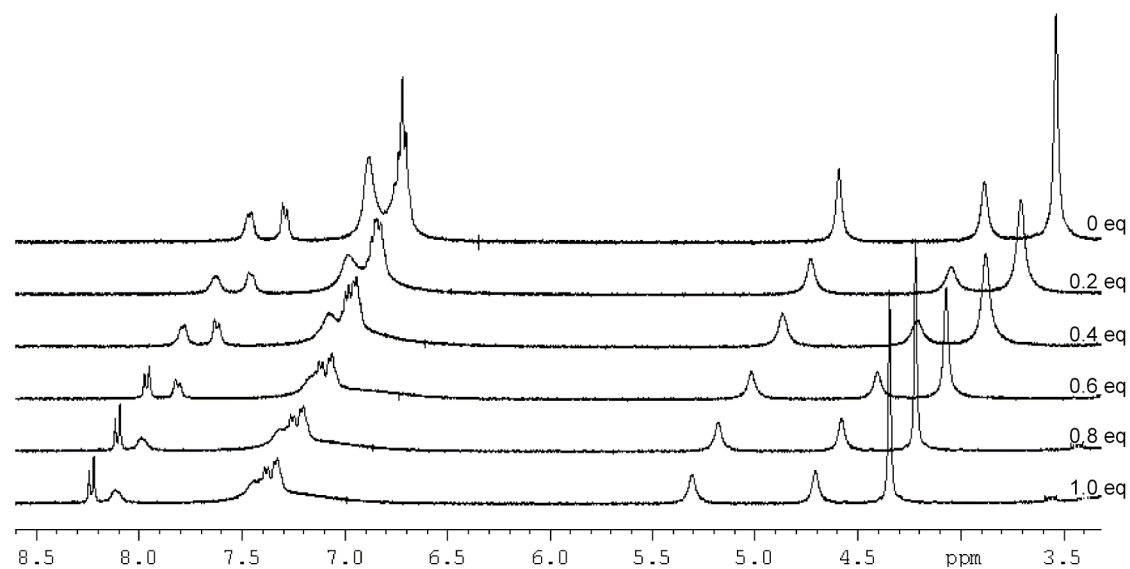

**Figure SI 22.** Changes in the <sup>1</sup>H-NMR (in acetone-d<sub>6</sub>) spectrum of **6a** (top) in acetone upon addition of increasing amounts of Zn<sup>2+</sup> until 1.0 equiv (bottom).

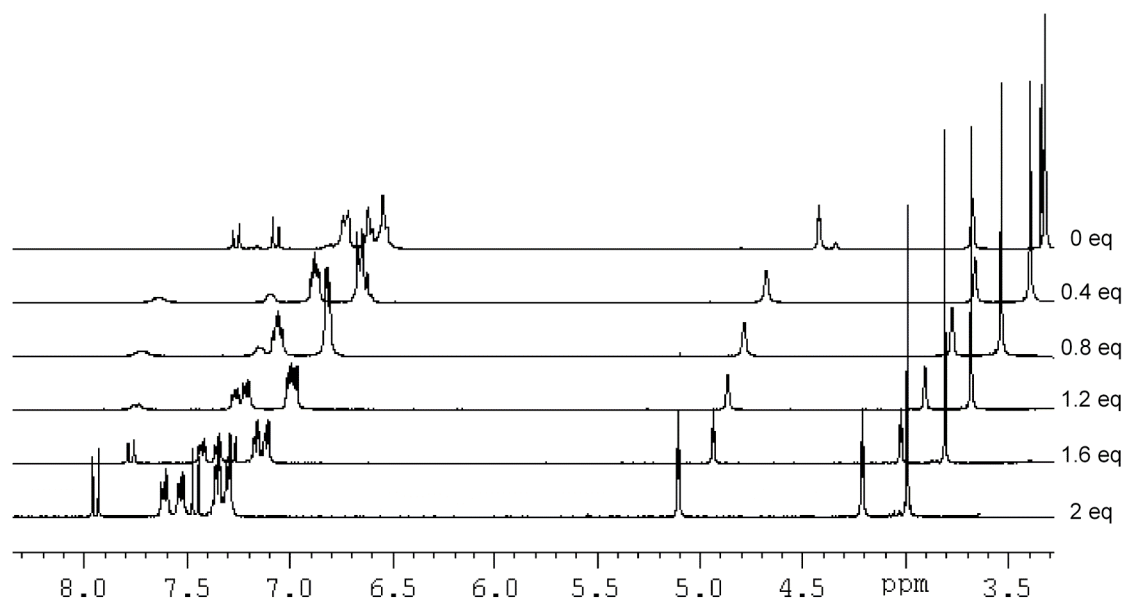

**Figure SI 23.** Changes in the <sup>1</sup>H-NMR (in acetone-*d*<sub>6</sub>) spectrum of **6a** (top) in acetone upon addition of increasing amounts of HP<sub>2</sub>O<sub>7</sub><sup>3-</sup> until 2.0 equiv (bottom).

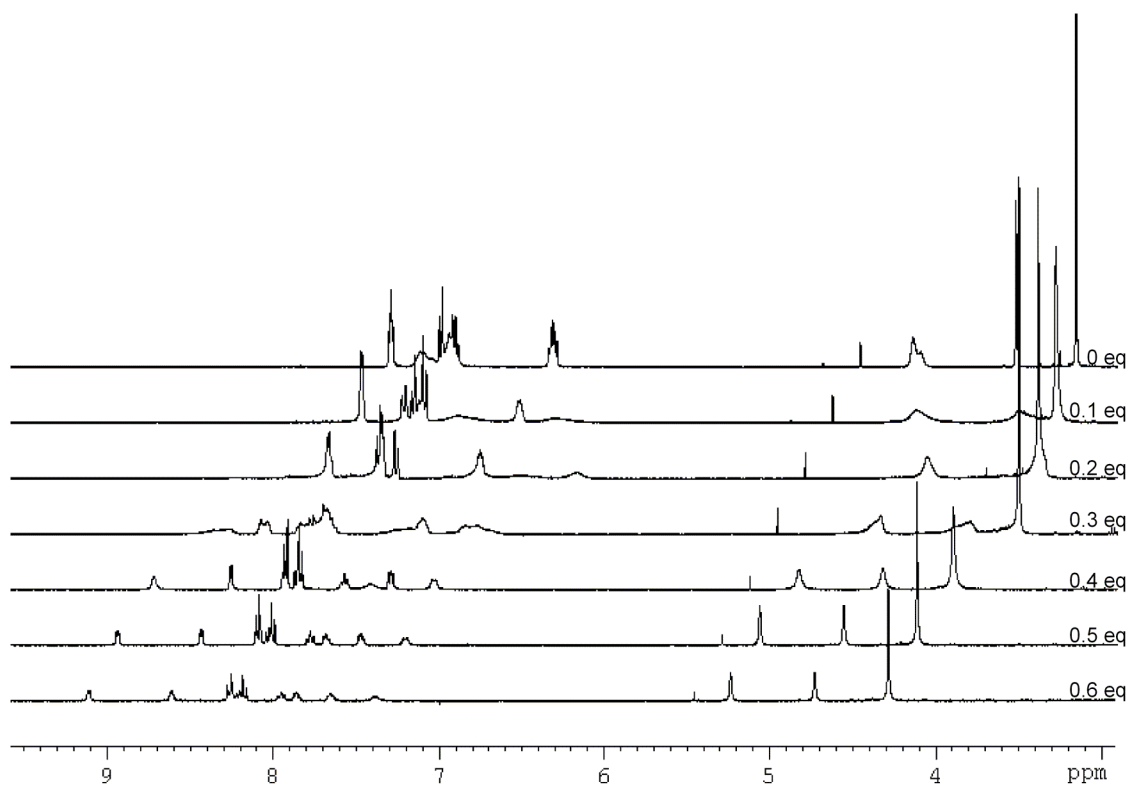

**Figure SI 24.** Changes in the <sup>1</sup>H-NMR (in acetonitrile-*d*<sub>3</sub>) spectrum of **6b** (top) in acetone upon addition of increasing amounts of Pb<sup>2+</sup> until 0.6 equiv (bottom).

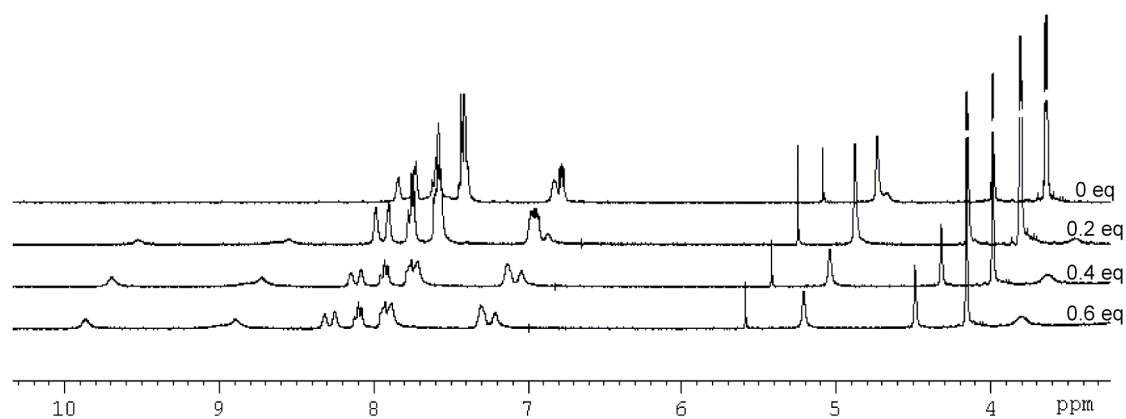

**Figure SI 25.** Changes in the <sup>1</sup>H-NMR (in acetone-*d*<sub>6</sub>) spectrum of **6b** (top) in acetone upon addition of increasing amounts of Ni<sup>2+</sup> until 0.6 equiv (bottom).

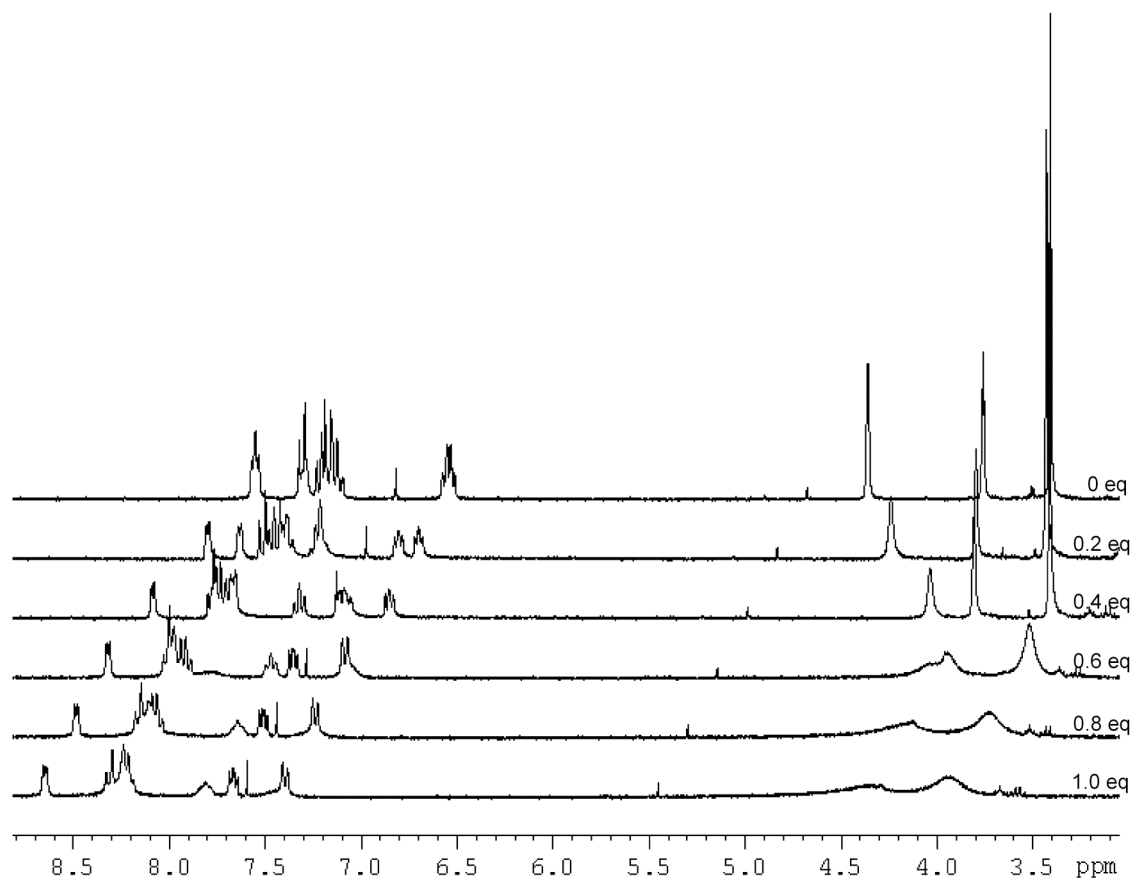

**Figure SI 26.** Changes in the <sup>1</sup>H-NMR (in acetonitrile-*d*<sub>3</sub>) spectrum of **6b** (top) in acetone upon addition of increasing amounts of Cd<sup>2+</sup> until 1.0 equiv (bottom).

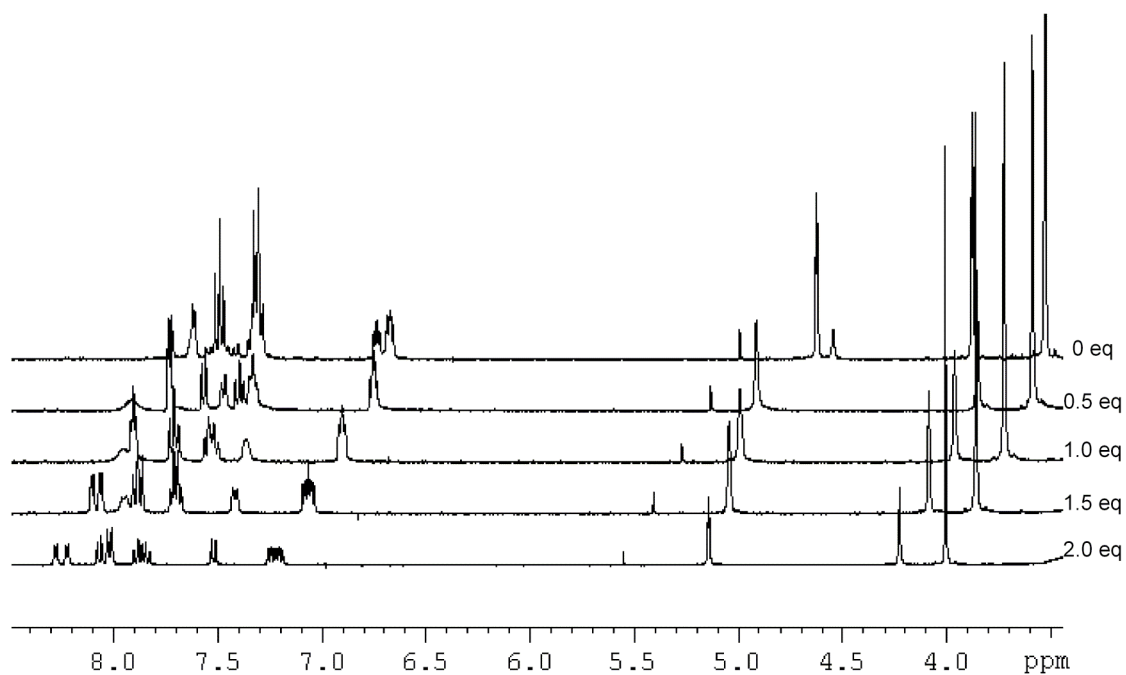

**Figure SI 27.** Changes in the <sup>1</sup>H-NMR (in acetone-*d*<sub>6</sub>) spectrum of **6b** (top) in acetone upon addition of increasing amounts of HP<sub>2</sub>O<sub>7</sub><sup>3-</sup> until 2.0 equiv (bottom).

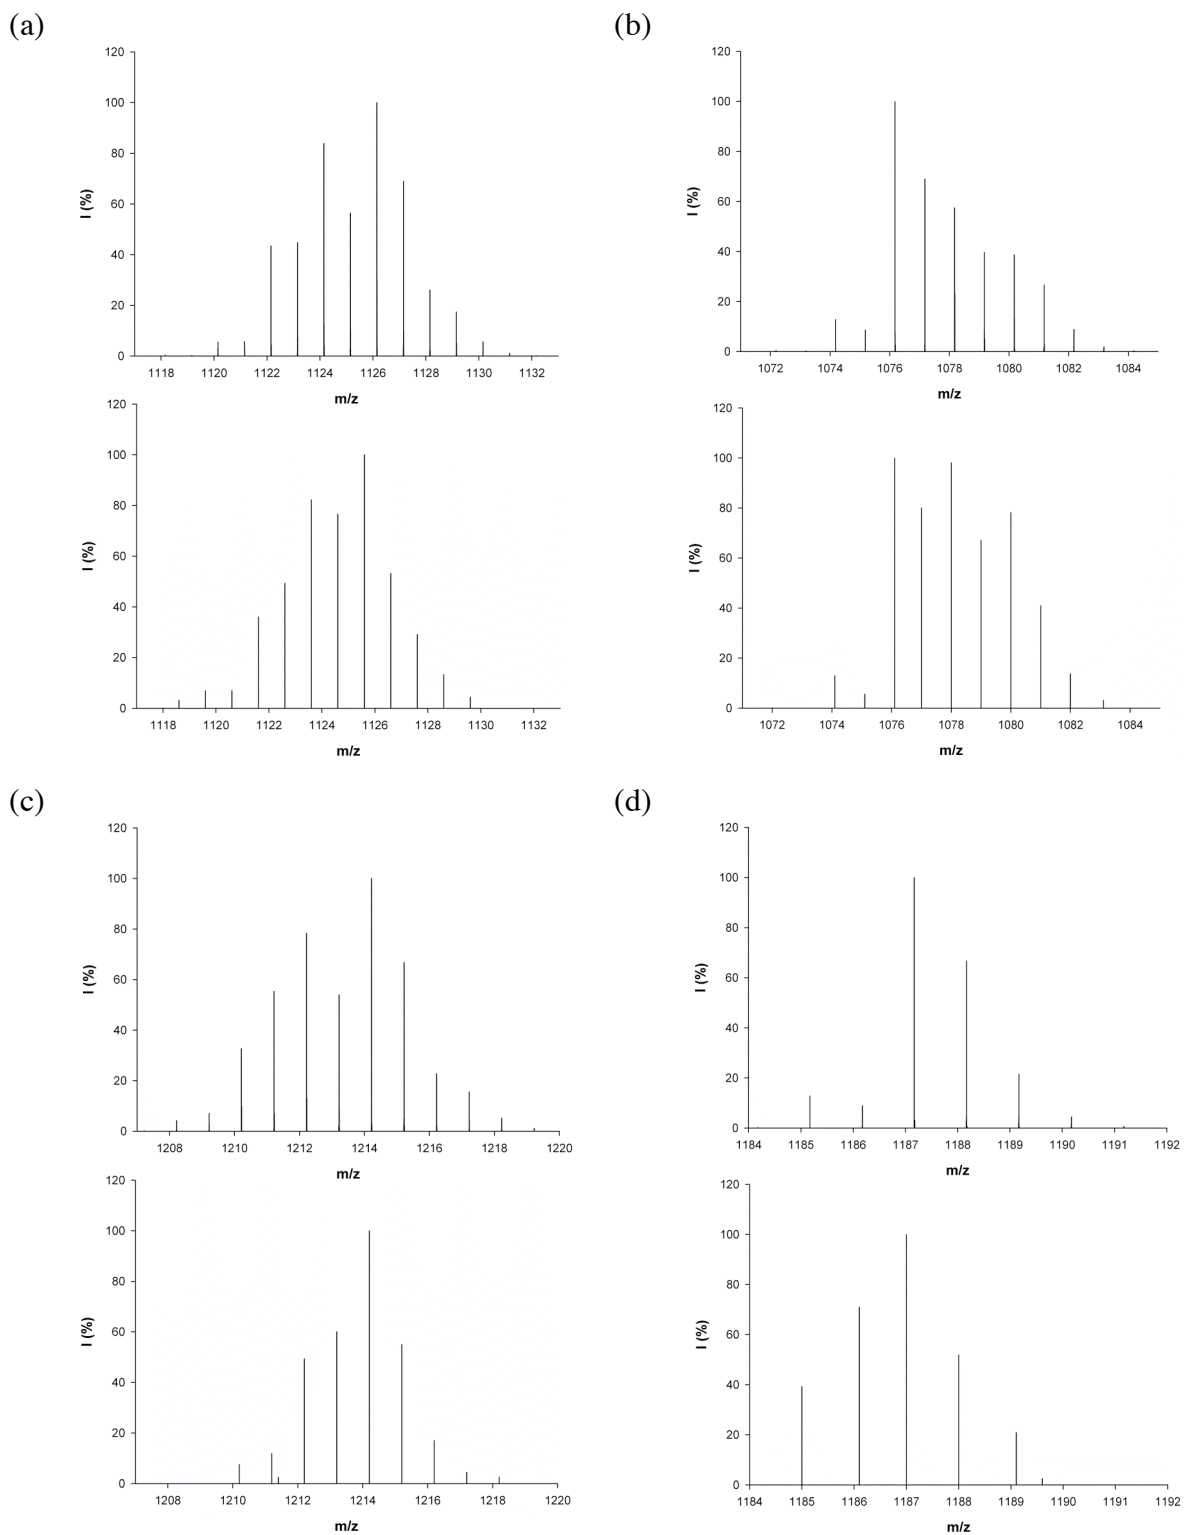

**Figure SI 28.** Relative abundance of the isotopic cluster for (a)  $6a_2 \cdot Cd^{2+}$ ; (b)  $6a_2 \cdot Zn^{2+}$ ; (c)  $6a_2 \cdot Hg^{2+}$ ; (d)  $6a_2 \cdot HP_2O_7^{3-}$  (top) simulated; (bottom) experimental.

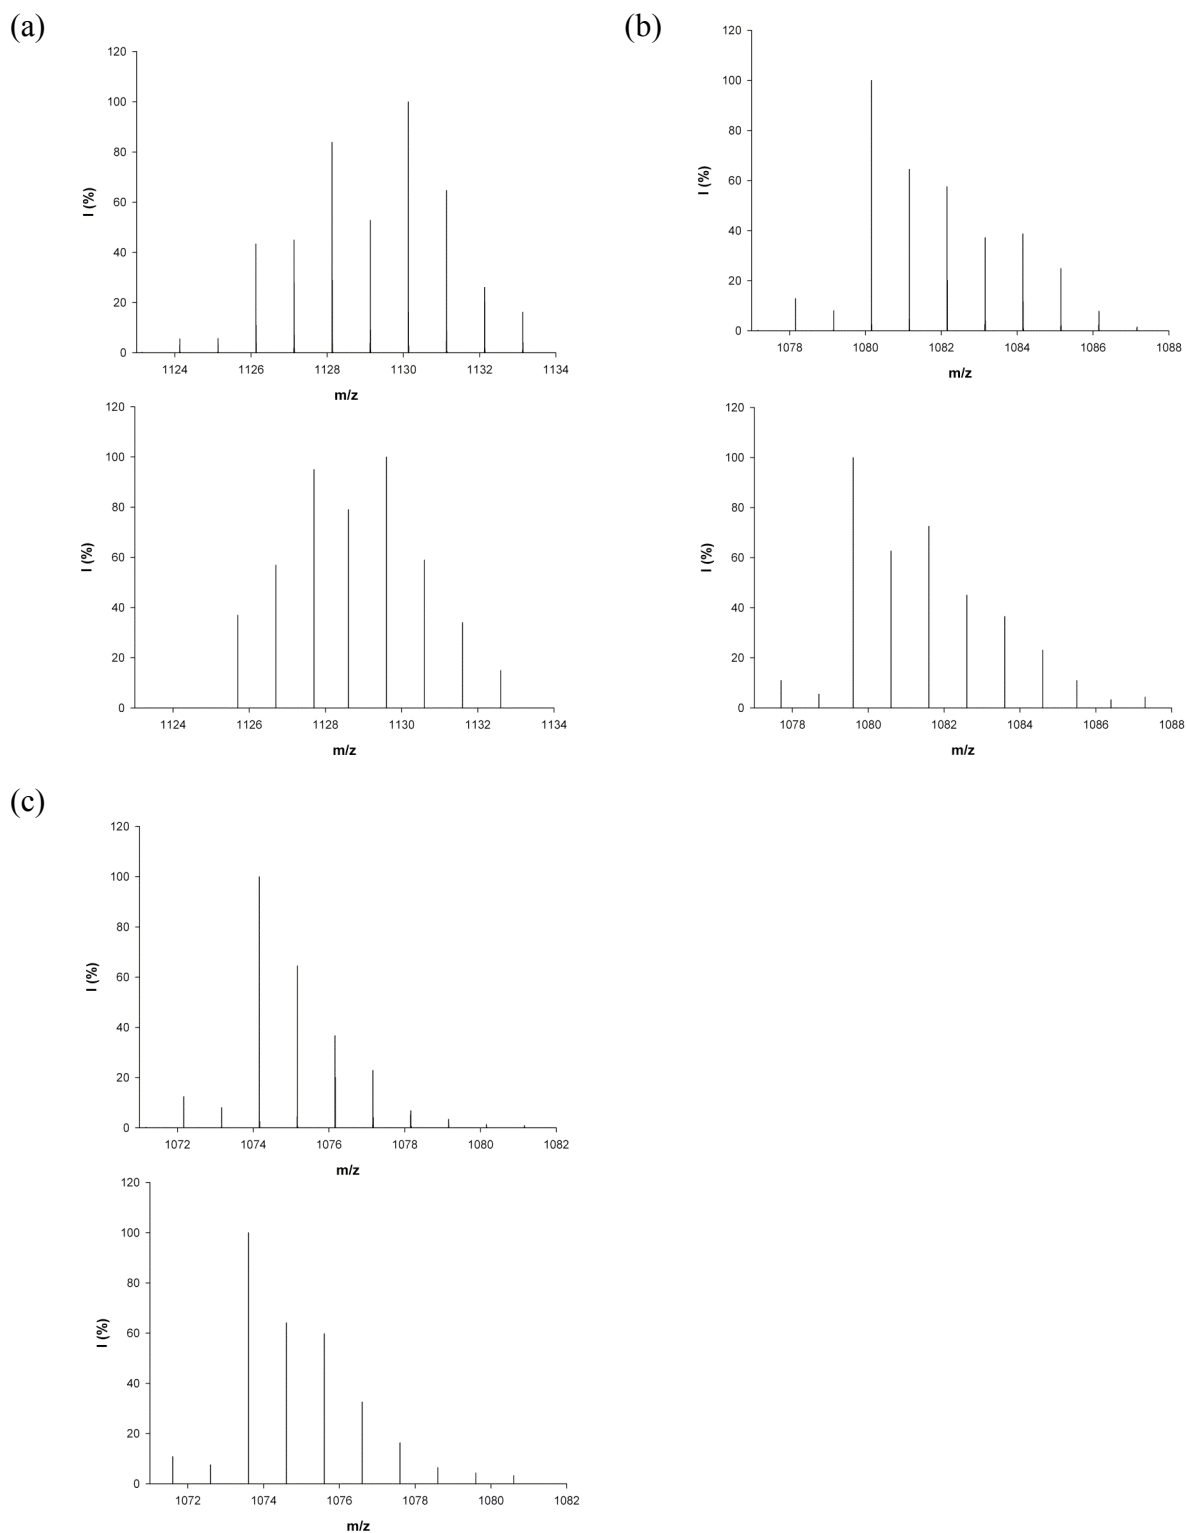

**Figure SI 29.** Relative abundance of the isotopic cluster for (a)  $6b_2 \cdot Cd^{2+}$ ; (b)  $6b_2 \cdot Zn^{2+}$ ; (c)  $6c_2 \cdot Ni^{2+}$  (top) simulated; (bottom) experimental.
